# Supplementary material for: Highly efficient nitrogen chelated ruthenium carbene metathesis catalysts
Source: Royal Society of Chemistry journal article supplement (doi:10.1039/c6dt03899a), 2016-01-01
Supplement: c6dt03899a1.pdf [file c6dt03899a1.pdf]

## Supporting Information

### High Efficient Nitrogen Chelated Ruthenium Carbene Metathesis Catalysts

Yulian Duan,<sup>ac</sup> Tao Wang,<sup>ac</sup> Qingxiao Xie,<sup>ac</sup> Xiaobo Yu,<sup>acd</sup> Weijie Guo,<sup>ac</sup> Jianhui Wang,<sup>\*ac</sup> and Guiyan Liu<sup>\*b</sup>

<sup>a</sup> Department of Chemistry, College of Science, Tianjin University, Tianjin 300350, P. R. China

<sup>b</sup> Tianjin Key Laboratory of Structure and Performance for Functional Molecules; Key Laboratory of Inorgan-ic-Organic hybrid Functional Material Chemistry (Tianjin Normal University); Ministry of Education; College of Chemistry, Tianjin Normal University, Tianjin 300387, P. R. China

<sup>c</sup> Collaborative Innovation center of Chemical Science and Engineering (Tianjin) 30072, P. R. China

<sup>d</sup> College of Materials Science and Engineering, Jilin Institute of Chemical Technology, Jilin 132022, P. R. China

#### Table of contents

|                                                                                            |     |
|--------------------------------------------------------------------------------------------|-----|
| General Information .....                                                                  | S3  |
| NMR-spectra of compounds <b>13a-f</b> and <b>14a-f</b> .....                               | S4  |
| Figure S1: <sup>1</sup> H NMR spectrum of compound <b>13a</b> in CDCl <sub>3</sub> .....   | S4  |
| Figure S2: <sup>13</sup> C NMR spectrum of compound <b>13a</b> in CDCl <sub>3</sub> .....  | S5  |
| Figure S3: <sup>1</sup> H NMR spectrum of compound <b>13b</b> in CDCl <sub>3</sub> .....   | S5  |
| Figure S4: <sup>13</sup> C NMR spectrum of compound <b>13b</b> in CDCl <sub>3</sub> .....  | S6  |
| Figure S5: <sup>1</sup> H NMR spectrum of compound <b>13c</b> in CDCl <sub>3</sub> .....   | S6  |
| Figure S6: <sup>13</sup> C NMR spectrum of compound <b>13c</b> in CDCl <sub>3</sub> .....  | S7  |
| Figure S7: <sup>1</sup> H NMR spectrum of compound <b>13d</b> in CDCl <sub>3</sub> .....   | S7  |
| Figure S8: <sup>13</sup> C NMR spectrum of compound <b>13d</b> in CDCl <sub>3</sub> .....  | S8  |
| Figure S9: <sup>1</sup> H NMR spectrum of compound <b>13e</b> in CDCl <sub>3</sub> .....   | S8  |
| Figure S10: <sup>13</sup> C NMR spectrum of compound <b>13e</b> in CDCl <sub>3</sub> ..... | S9  |
| Figure S11: <sup>1</sup> H NMR spectrum of compound <b>13f</b> in CDCl <sub>3</sub> .....  | S9  |
| Figure S12: <sup>13</sup> C NMR spectrum of compound <b>13f</b> in CDCl <sub>3</sub> ..... | S10 |
| Figure S13: <sup>1</sup> H NMR spectrum of compound <b>14a</b> in CDCl <sub>3</sub> .....  | S10 |
| Figure S14: <sup>13</sup> C NMR spectrum of compound <b>14a</b> in CDCl <sub>3</sub> ..... | S11 |
| Figure S15: <sup>1</sup> H NMR spectrum of compound <b>14b</b> in CDCl <sub>3</sub> .....  | S11 |
| Figure S16: <sup>13</sup> C NMR spectrum of compound <b>14b</b> in CDCl <sub>3</sub> ..... | S12 |
| Figure S17: <sup>19</sup> F NMR spectrum of compound <b>14b</b> in CDCl <sub>3</sub> ..... | S12 |

|                                                                                                                                                                   |     |
|-------------------------------------------------------------------------------------------------------------------------------------------------------------------|-----|
| Figure S18: $^1\text{H}$ NMR spectrum of compound <b>14c</b> in $\text{CDCl}_3$ .....                                                                             | S13 |
| Figure S19: $^{13}\text{C}$ NMR spectrum of compound <b>14c</b> in $\text{CDCl}_3$ .....                                                                          | S13 |
| Figure S20: $^{19}\text{F}$ NMR spectrum of compound <b>14c</b> in $\text{CDCl}_3$ .....                                                                          | S14 |
| Figure S21: $^1\text{H}$ NMR spectrum of compound <b>14d</b> in $\text{CDCl}_3$ .....                                                                             | S14 |
| Figure S22: $^{13}\text{C}$ NMR spectrum of compound <b>14d</b> in $\text{CDCl}_3$ .....                                                                          | S15 |
| Figure S23: $^{19}\text{F}$ NMR spectrum of compound <b>14d</b> in $\text{CDCl}_3$ .....                                                                          | S15 |
| Figure S24: $^1\text{H}$ NMR spectrum of compound <b>14e</b> in $\text{CDCl}_3$ .....                                                                             | S16 |
| Figure S25: $^{13}\text{C}$ NMR spectrum of compound <b>14e</b> in $\text{CDCl}_3$ .....                                                                          | S16 |
| Figure S26: $^{19}\text{F}$ NMR spectrum of compound <b>14e</b> in $\text{CDCl}_3$ .....                                                                          | S17 |
| Figure S27: $^1\text{H}$ NMR spectrum of compound <b>14f</b> in $\text{CDCl}_3$ .....                                                                             | S17 |
| Figure S28: $^{13}\text{C}$ NMR spectrum of compound <b>14f</b> in $\text{CDCl}_3$ .....                                                                          | S18 |
| Figure S29: $^{19}\text{F}$ NMR spectrum of compound <b>14f</b> in $\text{CDCl}_3$ .....                                                                          | S18 |
| Crystallographic details for <b>14d</b> .....                                                                                                                     | S19 |
| Table S1. Crystal data and structure refinement for <b>14d</b> (A160311C, CCDC: 1504010).<br>.....                                                                | S19 |
| Table S2. Fractional Atomic Coordinates ( $\times 10^4$ ) and Equivalent Isotropic Displacement<br>Parameters ( $\text{\AA}^2 \times 10^3$ ) for <b>14d</b> ..... | S20 |
| Table S3. Anisotropic Displacement Parameters ( $\text{\AA}^2 \times 10^3$ ) for <b>14d</b> .....                                                                 | S22 |
| Table S4 . Bond Lengths for <b>14d</b> . .....                                                                                                                    | S24 |
| Table S5. Bond Angles for <b>14d</b> .....                                                                                                                        | S25 |
| Table S6. Hydrogen Atom Coordinates ( $\text{\AA} \times 10^4$ ) and Isotropic Displacement Parameters<br>( $\text{\AA}^2 \times 10^3$ ) for <b>14d</b> .....     | S27 |

## General Information

The starting materials were synthesized and purified according to the literature procedures.<sup>1-6</sup> Other chemicals and reagents were obtained from commercial sources. All reactions were monitored by analytical thin layer chromatography on 0.20 mm Yantai Huagong silica gel plates and spots were detected by UV-absorption. Silica gel (200-300 mesh) (from Yantai Huagong Chem. Company, Ltd.) was used for flash chromatography. NMR spectra were obtained on 400 MHz spectrometer with CDCl<sub>3</sub> as solvent. The chemical shifts are reported in ppm relative to CDCl<sub>3</sub> ( $\delta = 7.26$ ) for <sup>1</sup>H NMR and relative to the central CDCl<sub>3</sub> resonance ( $\delta = 77.0$ ) for <sup>13</sup>C NMR. For <sup>19</sup>F NMR, the (trifluoromethyl)benzene was used as an external standard. Coupling constants (*J*) are quoted in Hz for <sup>1</sup>H. Multiplicities are reported as follows: singlet (s), doublet (d), doublet of doublets (dd), triplet (t), quartet (q), and multiplet (m). Conversions were obtained by <sup>1</sup>H NMR analysis of the sample. NMR data of known compounds is in agreement with literature values. Infrared spectra were recorded on FT-IR spectrophotometer. Elemental analyses were performed by the Elemental Analysis Section of Tianjin University.

## References

- (1) (a) Liu, G. -Y.; Shao, M. -B.; Zhang, H. -P.; Wang, J. -H. *Polyhedron*. **2014**, *76*, 51–54. (b) Zhang, Y. -R.; Shao, M. -B.; Zhang, H. -P.; Li, Y. -Q.; Liu, D. -Y.; Cheng, Y.; Liu, G. -Y.; Wang, J. -H. *J. Organomet. Chem.* **2014**, *756*, 1–9. (c) Bieniek, M.; Samojzowicz, C.; Sashuk, V.; Bujok, R.; Śledź, P.; Lugań, N.; Lavigne, G.; Arlt, D.; Grela, K. *Organometallics*. **2011**, *30*, 4144–4158.
- (2) (a) Van Ornum, S. G. V.; Bruendl, M. M.; Cao, H.; Reddy, M.; Grubisha, D. S.; Bennett, D. W.; Cook, J. M. *J. Org. Chem.* **2000**, *65*, 1957–1971. (b) Riggi, D. I.; Surzur, J. M.; Bertrand, M.P. *Tetrahedron*. **1988**, *44*, 7119–7125. (c) Moore, J. D.; Byrne, R. J.; Vedantham, P.; Flynn, D. L.; Hanson, P. R. *Org. Lett.* **2003**, *5*, 4241–4244. (d) Edwards, P. G.; Paisey, S.J.; Tooze, R. P.; *J. Chem. Soc. Perkin Trans.* **2000**, 3122–3128. (e) Garst, M. E.; Bonfiglio, J. N.; Marks, J. *J. Org. Chem.* **1982**, *47*, 1494–1500. (f) Otterlo, W. A. L.; Ngidi, E. L.; Koning, C. B.; *Tetrahedron Lett.* **2003**, *44*, 6483–6486. (g) Yao, Q.; Zhang, Y.; *J. Am. Chem. Soc.* **2004**, *126*, 74–75. (h) Otterlo, W. A. L.; Ngidi, E. L.; Kuzvidza, S.; Morgans, G. L. Morgans, S. S. Moleele; Koning, C. B.; *Tetrahedron*. **2005**, *61*, 9996–10006. (i) Kim, S. H.; Zuercher, W. J.; Bowden, N. B.; Grubbs, R. H. *J. Org. Chem.* **1996**, *61*, 1073–1081. (j) Barbot, F.; Dauphin, B.; Miginiac, P.; *Synthesis*, **1985**, 768–770.
- (3) (a) Scholl, M.; Ding, S.; Lee, C. W.; Grubbs, R. H. *Org. Lett.* **1999**, *1*, 953–956. (b) Trnka, T. M.; Morgan, J. P.; Sanford, M. S.; Willhelm, T. E.; Scholl, M.; Choi, T.-L.; Ding, S.; Day, M. W.; Grubbs, R. H. *J. Am. Chem. Soc.* **2003**, *125*, 2546–2558.
- (4) Yin, Y.; Zhao, G. *Journal of Fluorine Chemistry*. **2006**, *128*, 40–45.
- (5) Fu, S. -M.; Yang, H. -H.; Li, G. -Q.; Deng, Y. -F.; Jiang, H. -F.; Zeng, W. *Org. Lett.* **2015**, *17*, 1018–1021.
- (6) Brucelle, F.; Renaud, P. *Org. Lett.* **2012**, *14*, 3048–3051.

NMR-spectra of compounds **13a-f** and **14a-f**.

Figure S1:  $^1\text{H}$  NMR spectrum of compound **13a** in  $\text{CDCl}_3$

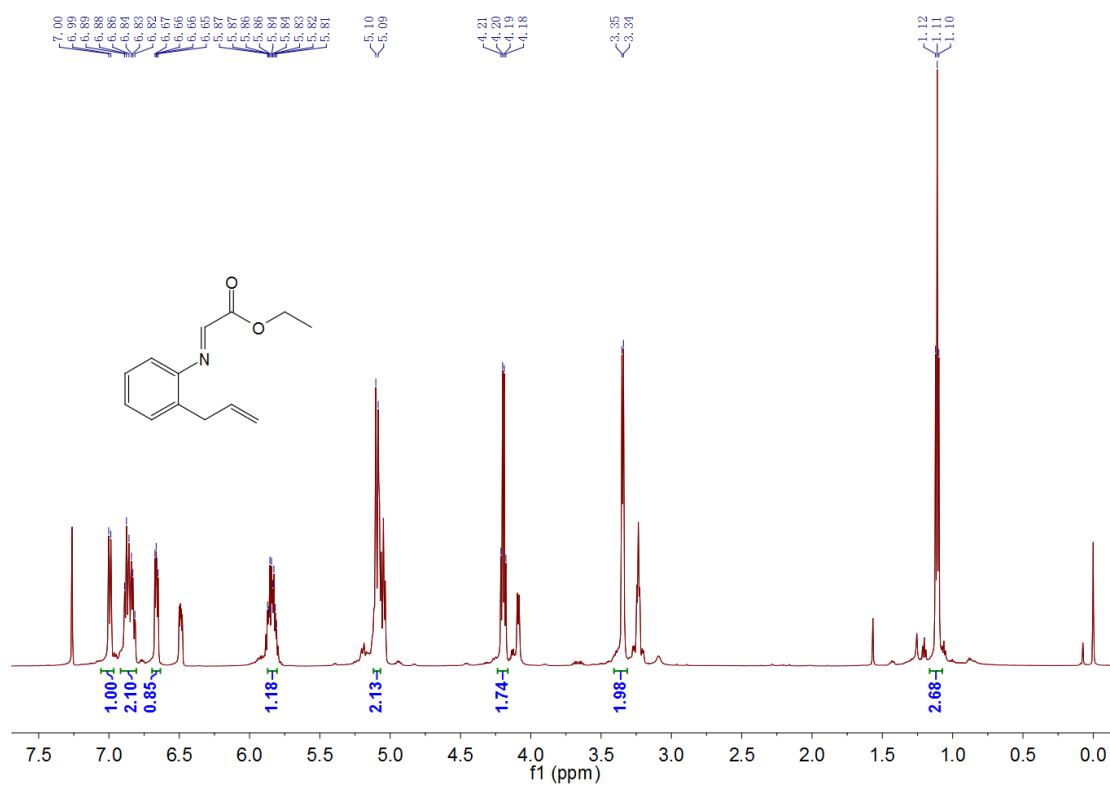

Figure S2:  $^{13}\text{C}$  NMR spectrum of compound **13a** in  $\text{CDCl}_3$

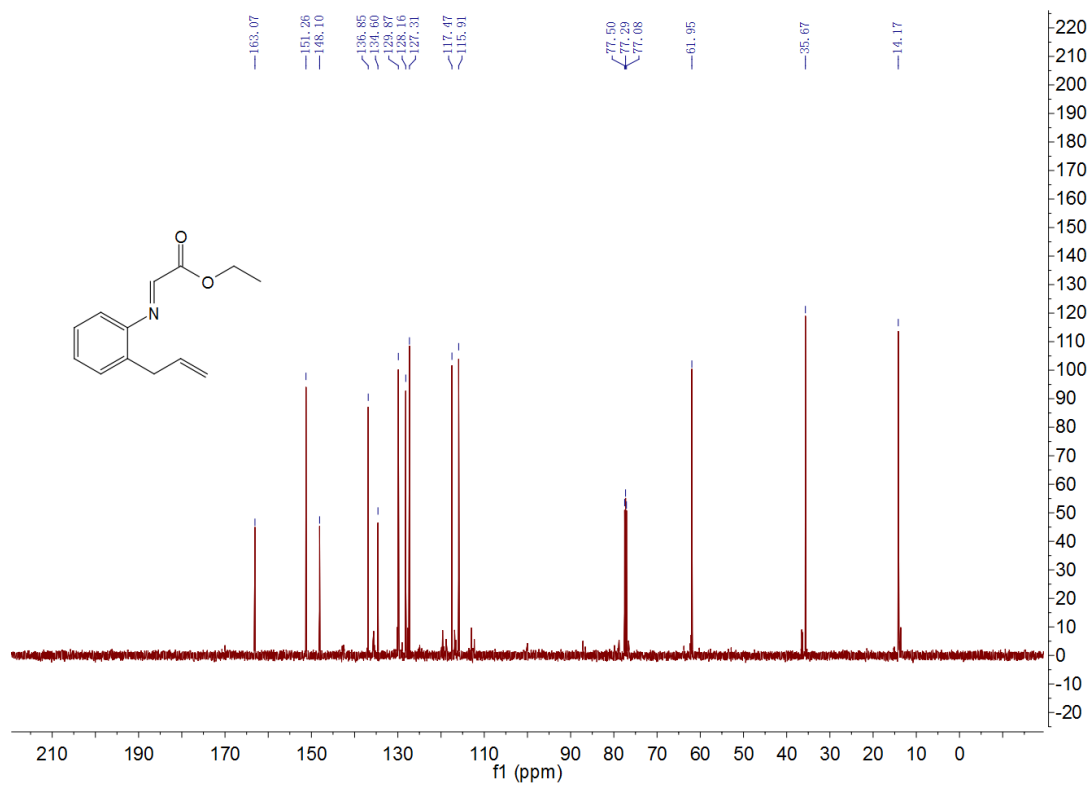

Figure S3:  $^1\text{H}$  NMR spectrum of compound **13b** in  $\text{CDCl}_3$

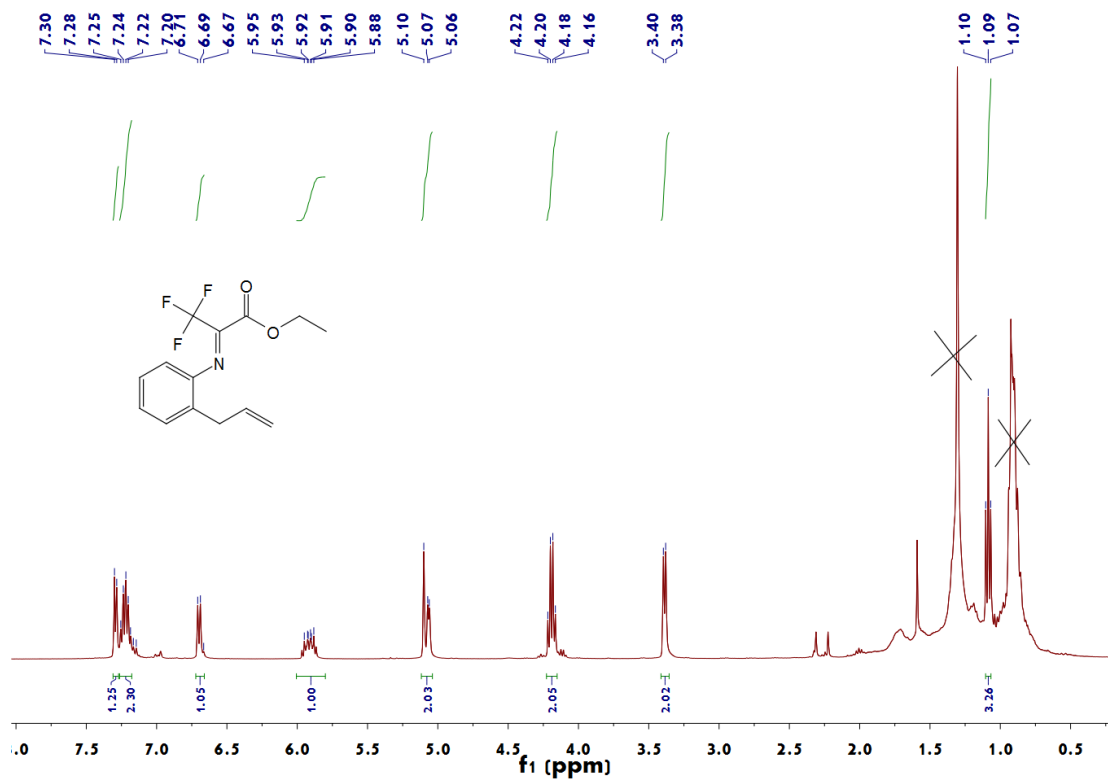

Figure S4:  $^{13}\text{C}$  NMR spectrum of compound **13b** in  $\text{CDCl}_3$

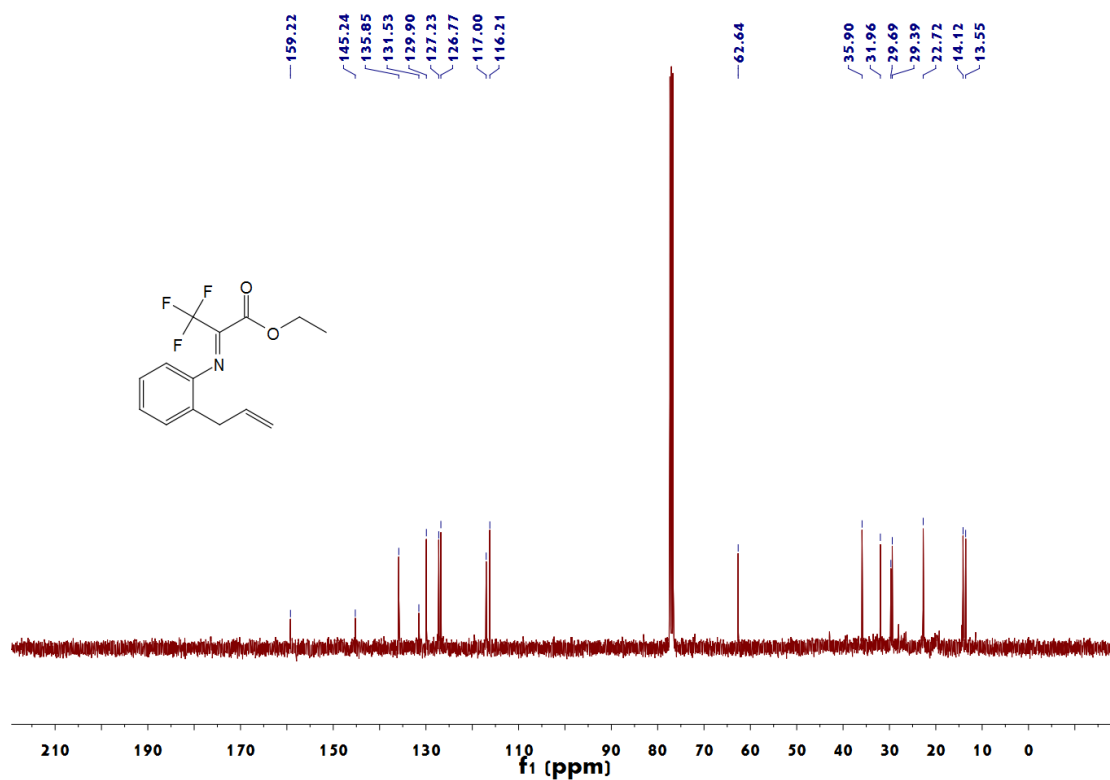

Figure S5:  $^1\text{H}$  NMR spectrum of compound **13c** in  $\text{CDCl}_3$

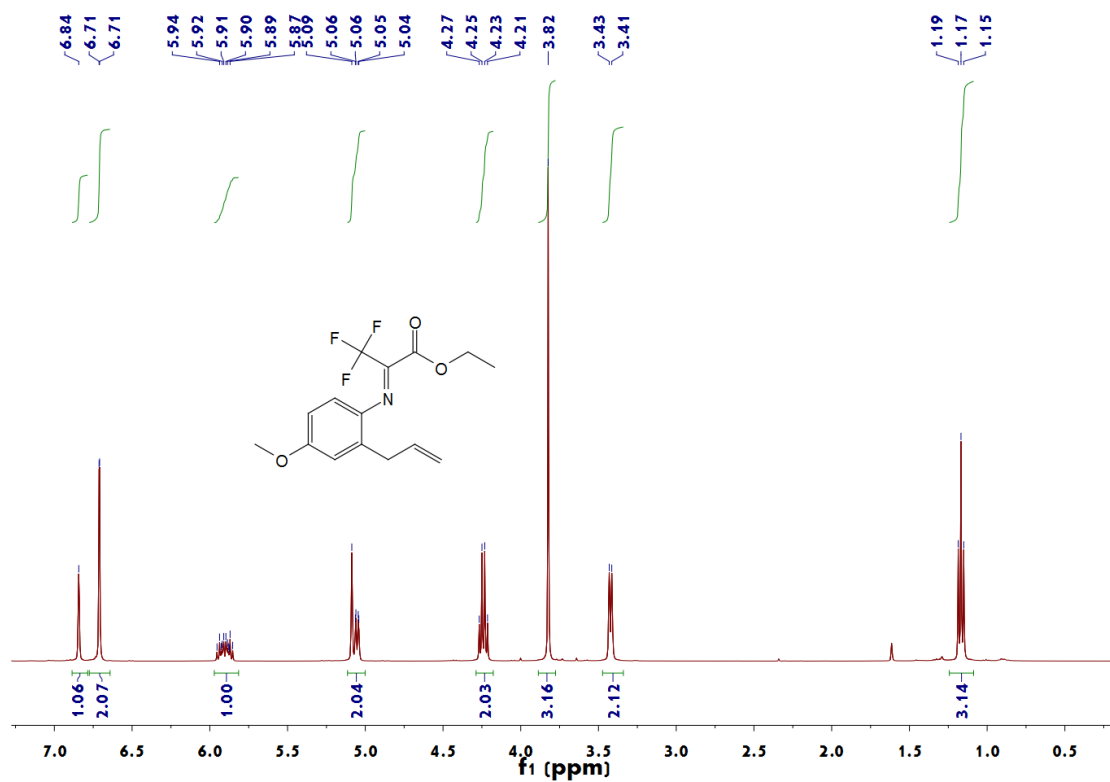

Figure S6:  $^{13}\text{C}$  NMR spectrum of compound **13c** in  $\text{CDCl}_3$

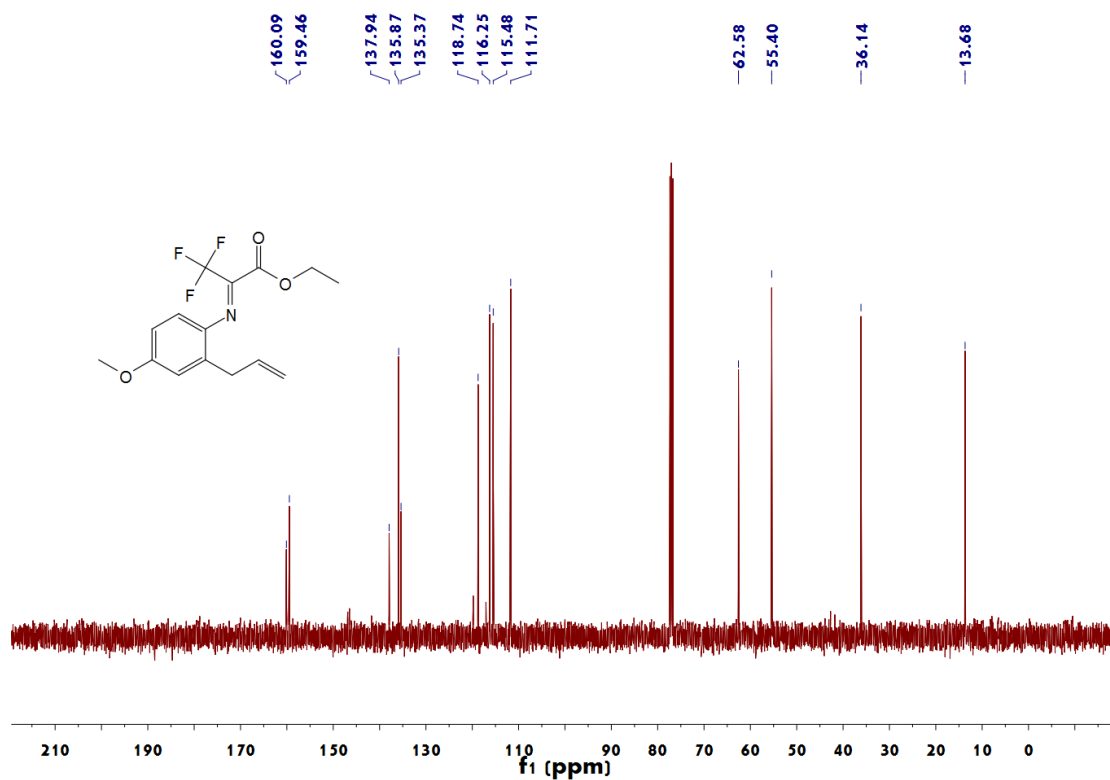

Figure S7:  $^1\text{H}$  NMR spectrum of compound **13d** in  $\text{CDCl}_3$

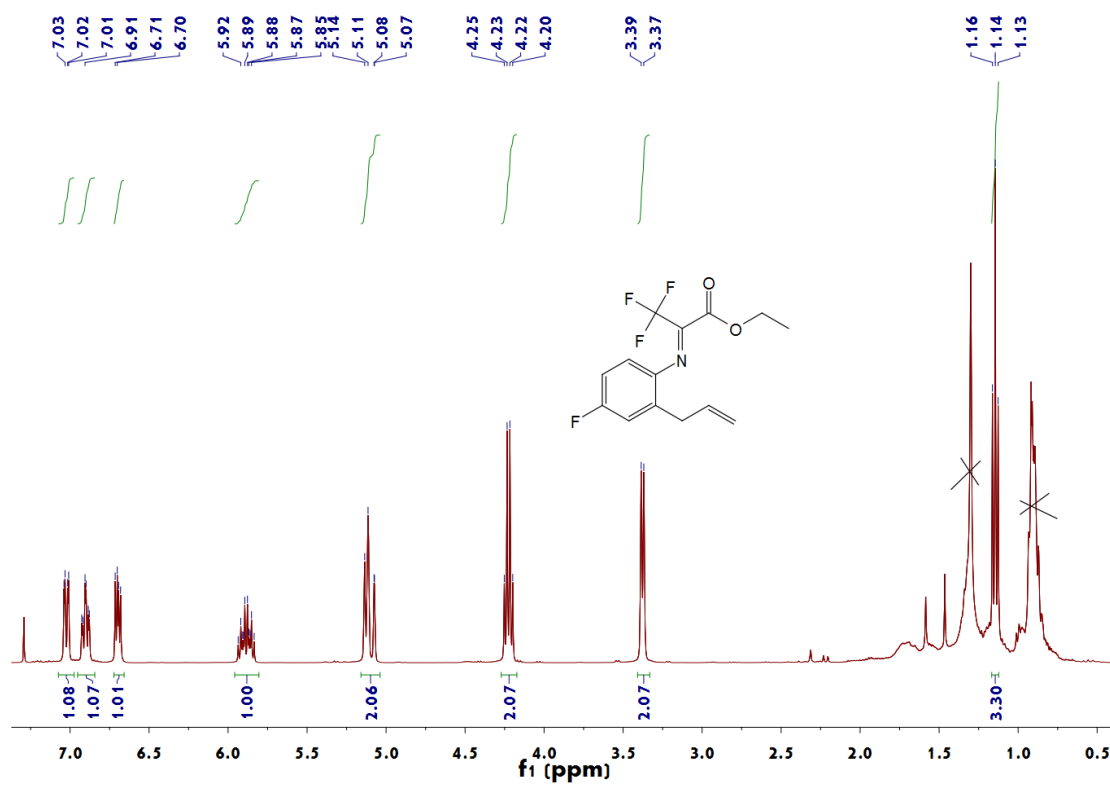

Figure S8:  $^{13}\text{C}$  NMR spectrum of compound **13d** in  $\text{CDCl}_3$

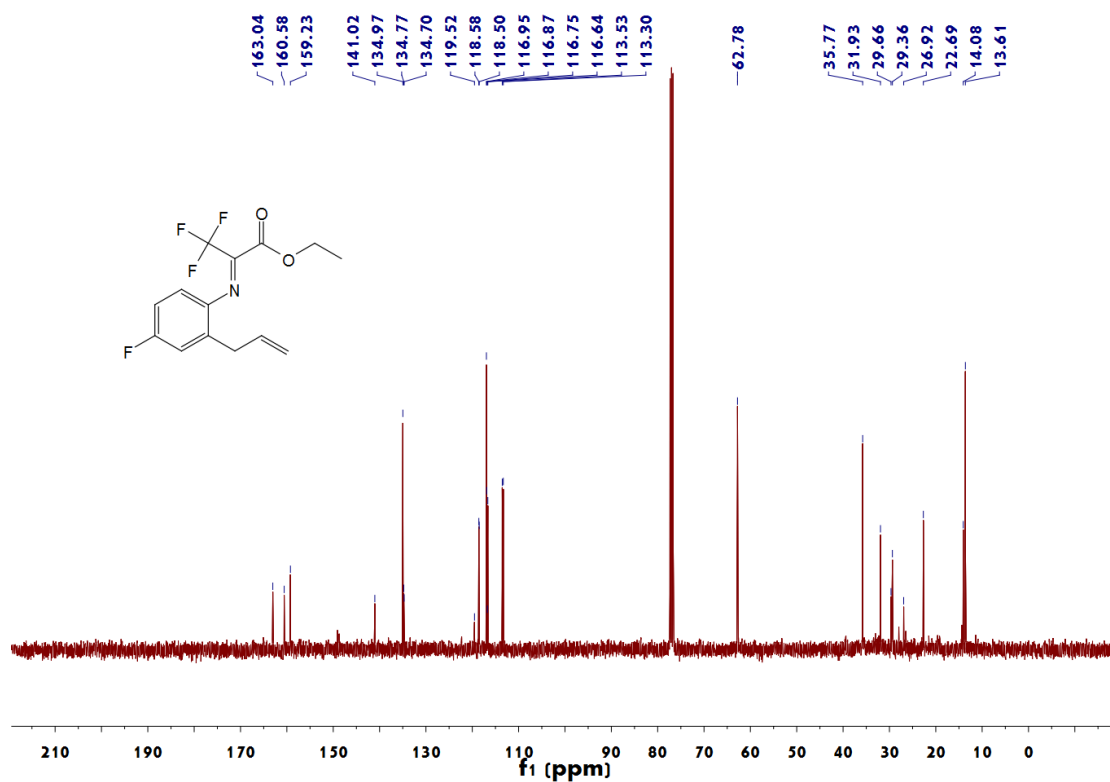

Figure S9:  $^1\text{H}$  NMR spectrum of compound **13e** in  $\text{CDCl}_3$

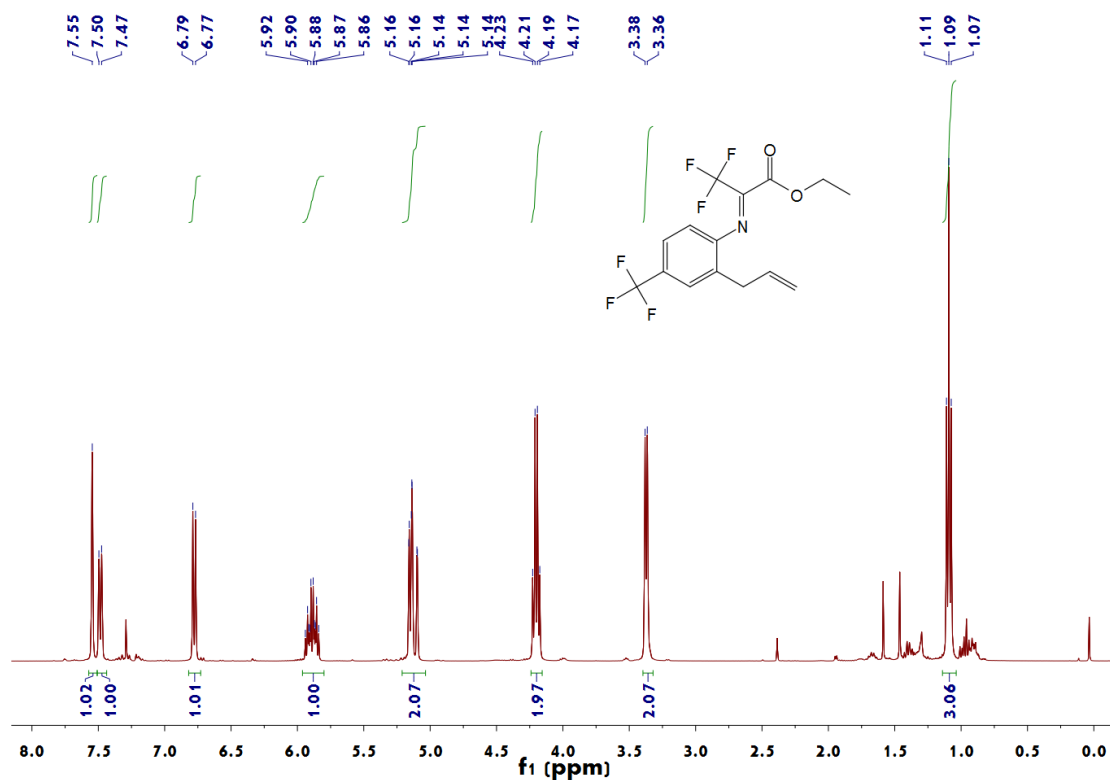



Figure S10:  $^{13}\text{C}$  NMR spectrum of compound **13e** in  $\text{CDCl}_3$

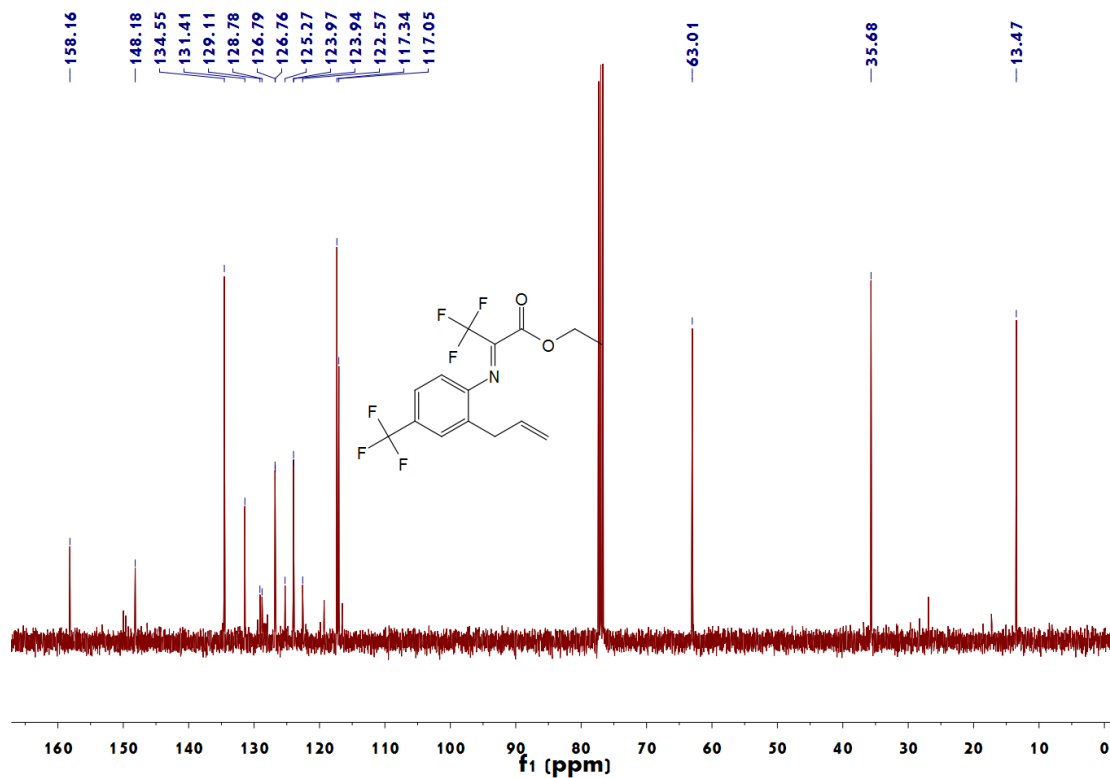

Figure S11:  $^1\text{H}$  NMR spectrum of compound **13f** in  $\text{CDCl}_3$

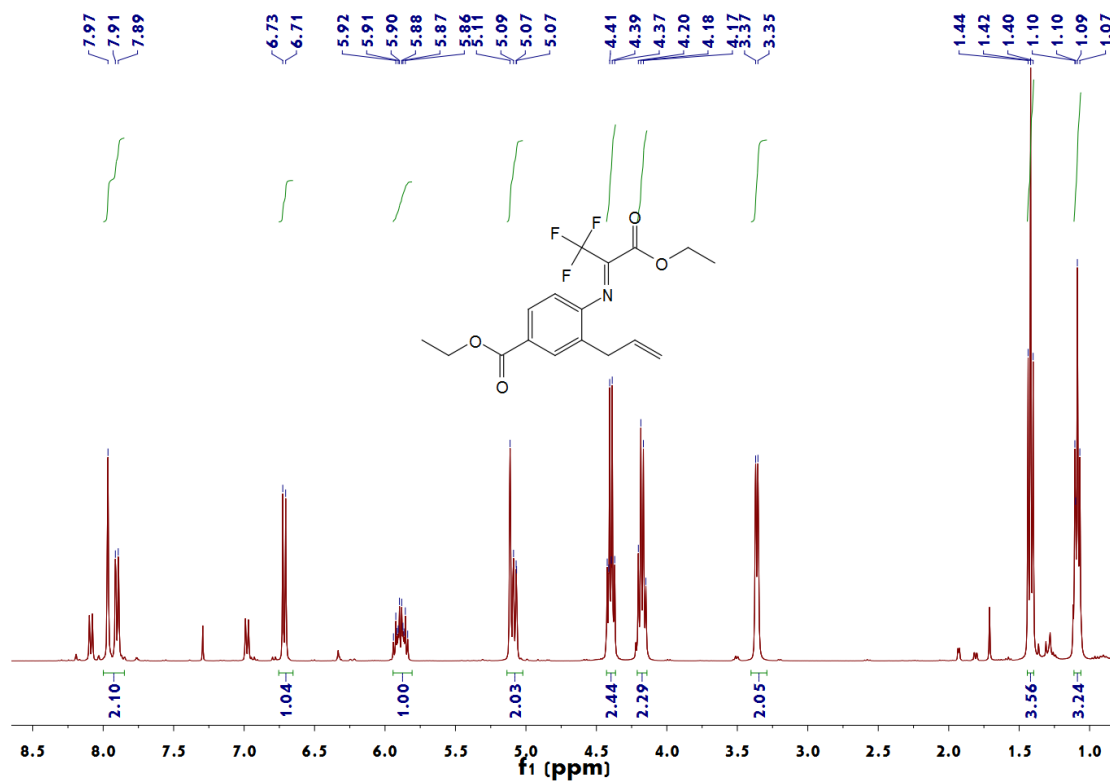

Figure S12:  $^{13}\text{C}$  NMR spectrum of compound **13f** in  $\text{CDCl}_3$

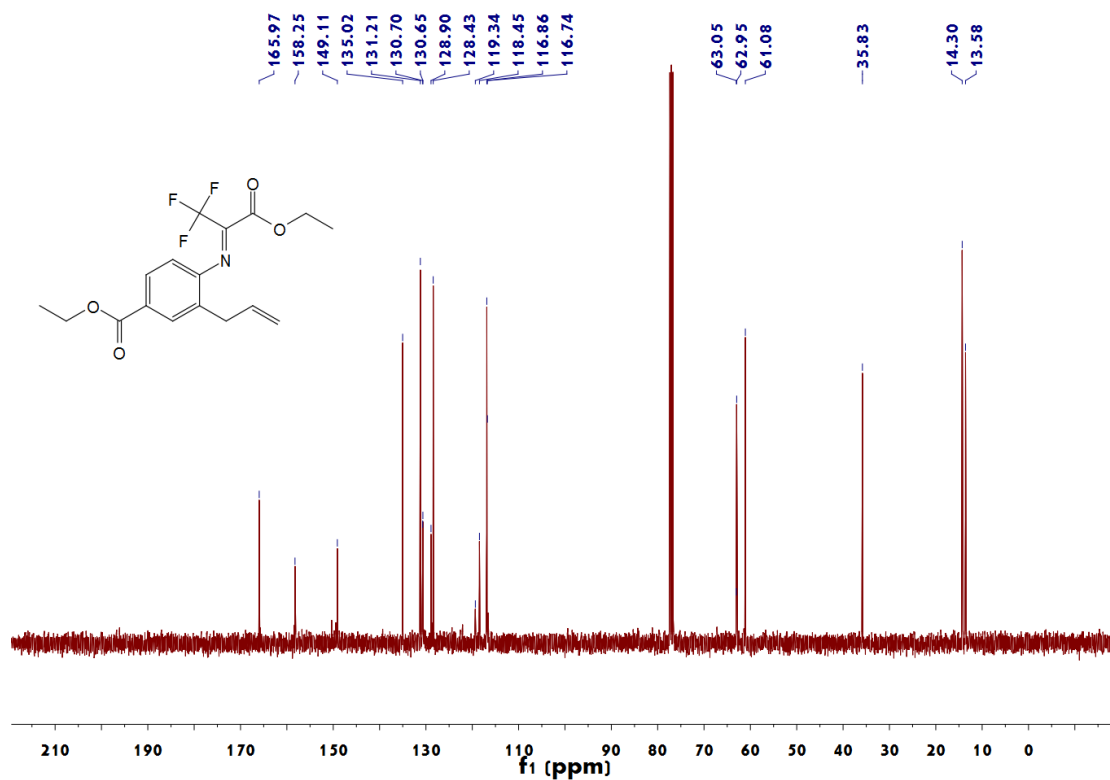

Figure S13:  $^1\text{H}$  NMR spectrum of compound **14a** in  $\text{CDCl}_3$

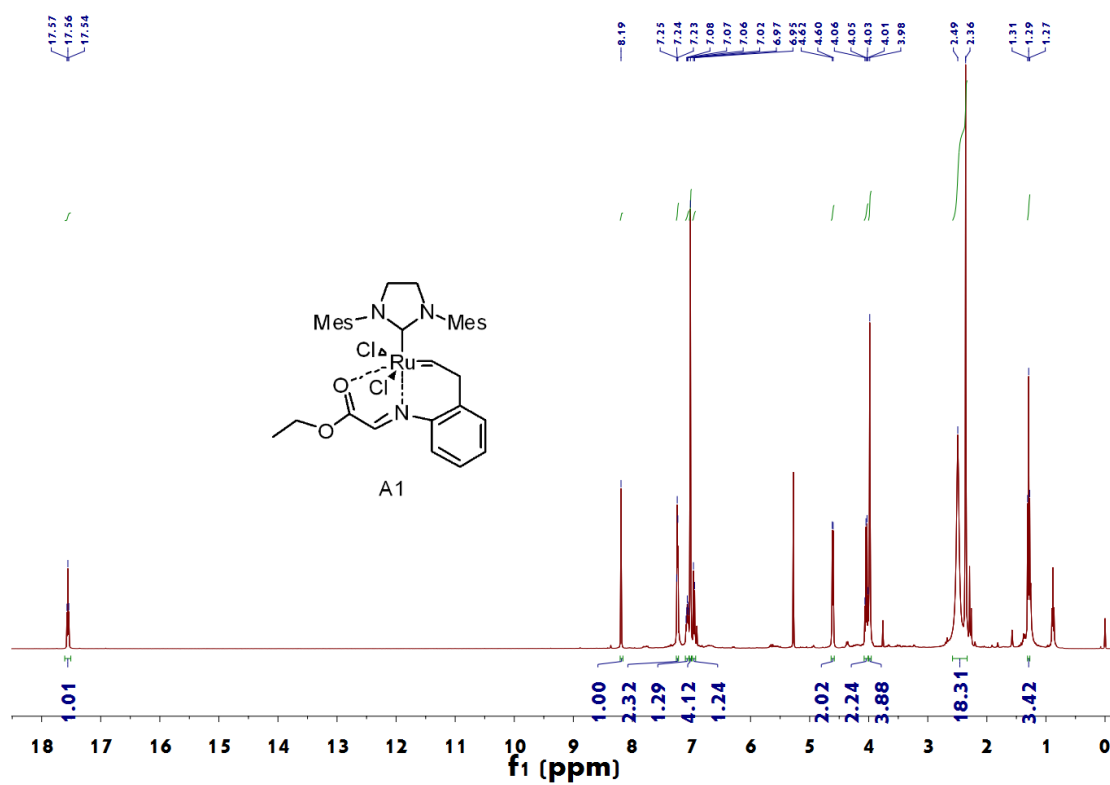

Figure S14:  $^{13}\text{C}$  NMR spectrum of compound **14a** in  $\text{CDCl}_3$

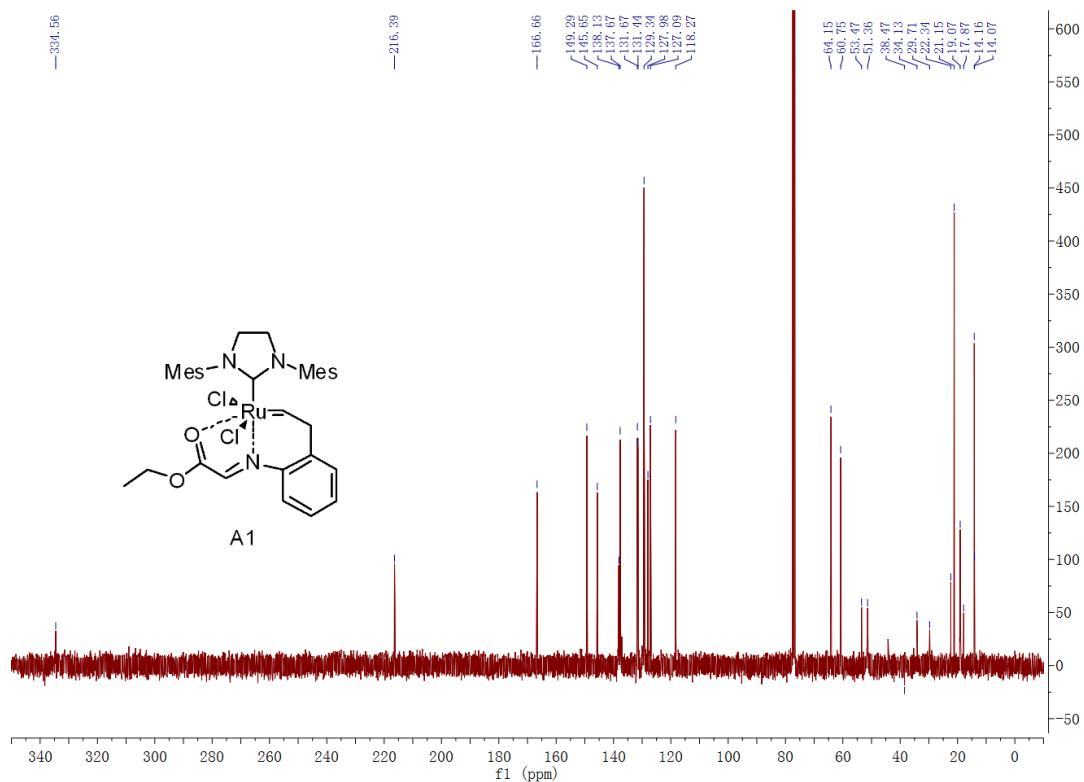

Figure S15:  $^1\text{H}$  NMR spectrum of compound **14b** in  $\text{CDCl}_3$

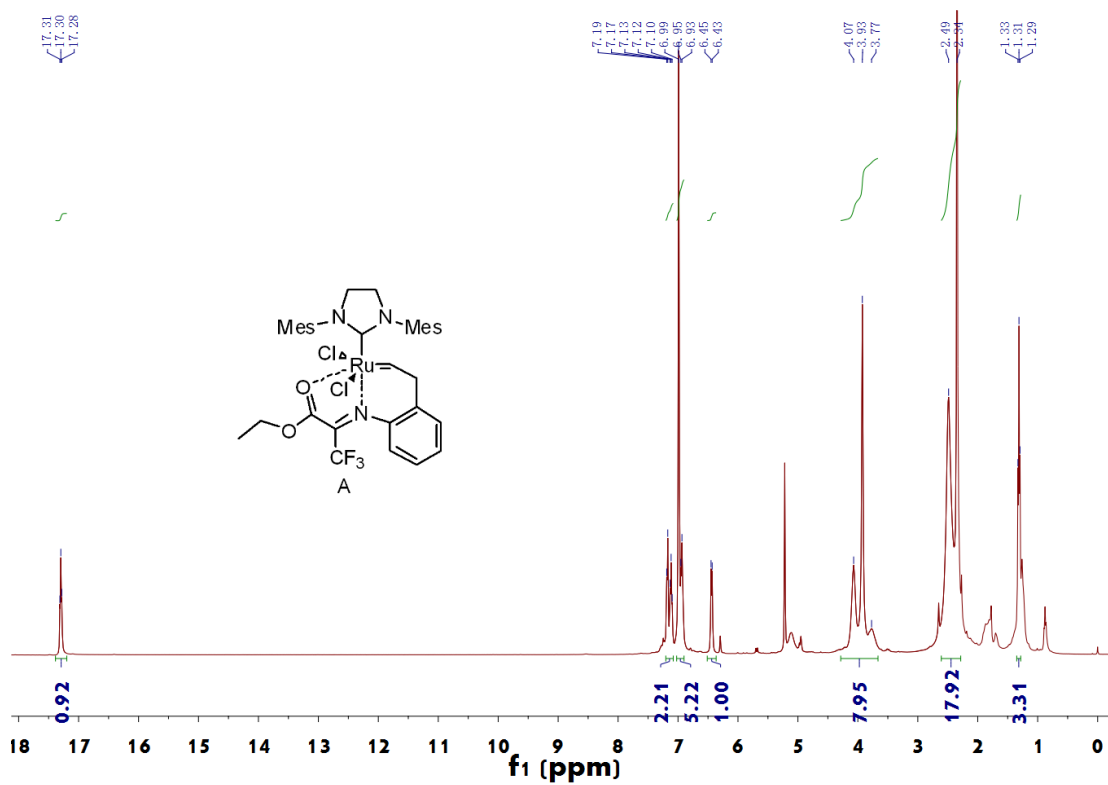

Figure S16:  $^{13}\text{C}$  NMR spectrum of compound **14b** in  $\text{CDCl}_3$

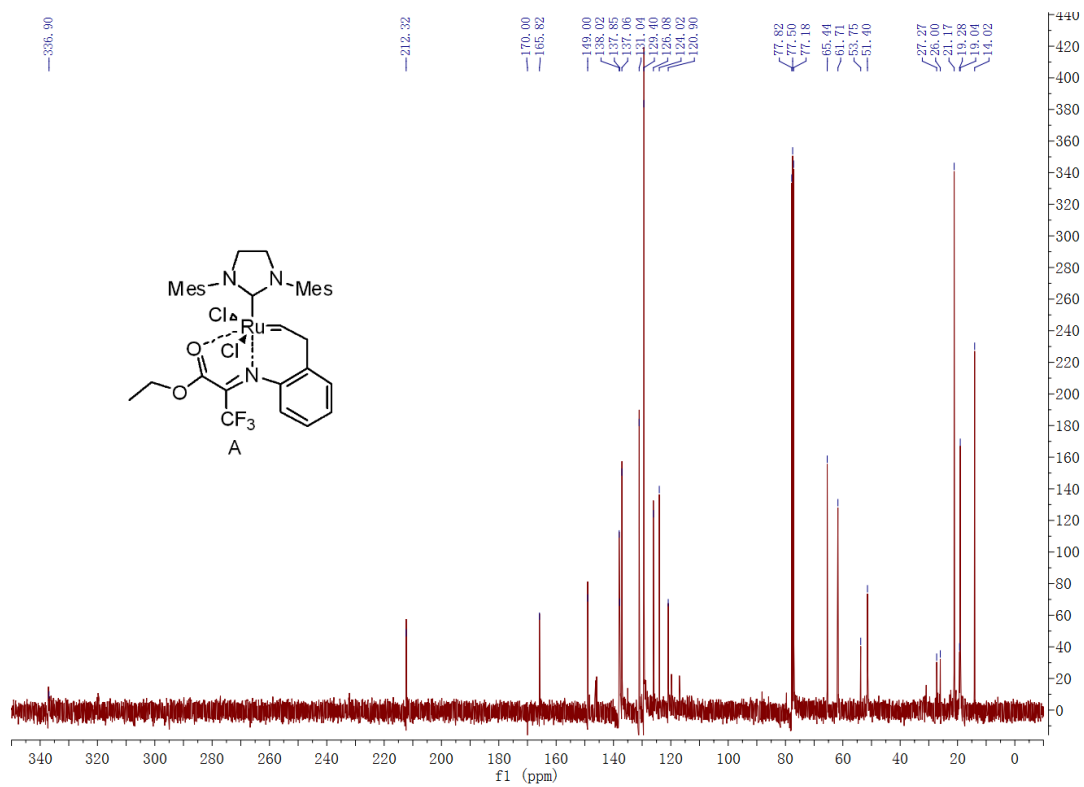

Figure S17:  $^{19}\text{F}$  NMR spectrum of compound **14b** in  $\text{CDCl}_3$

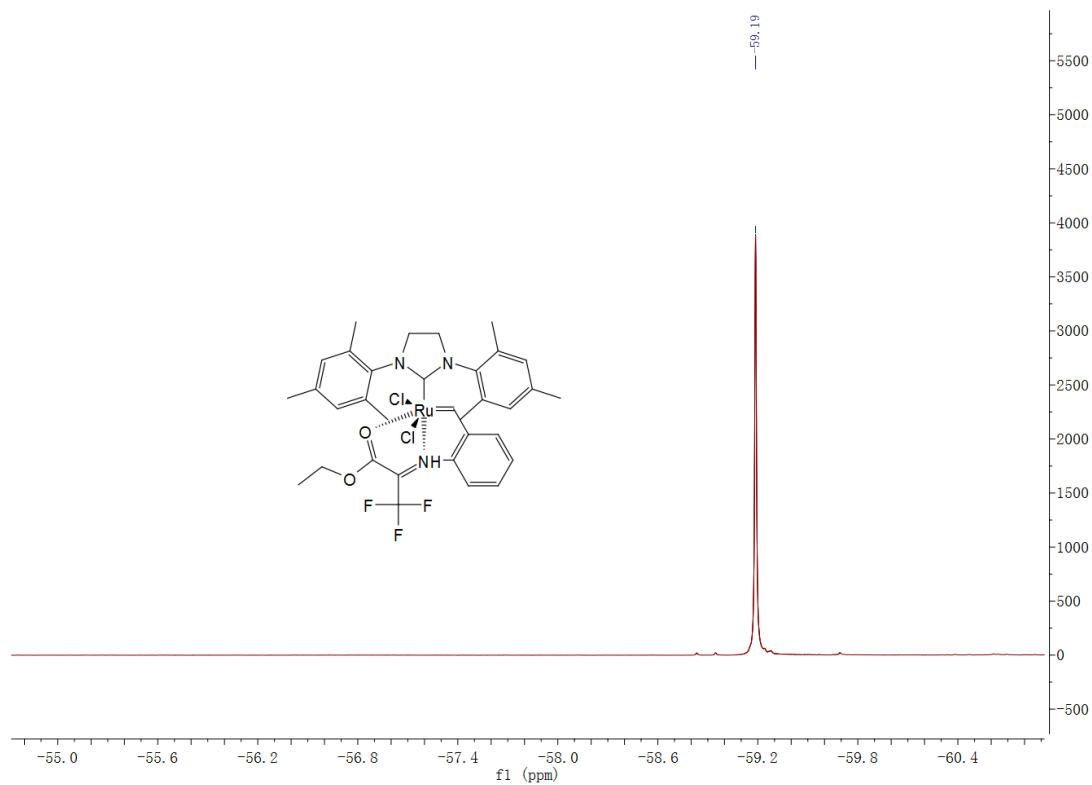

Figure S18:  $^1\text{H}$  NMR spectrum of compound **14c** in  $\text{CDCl}_3$

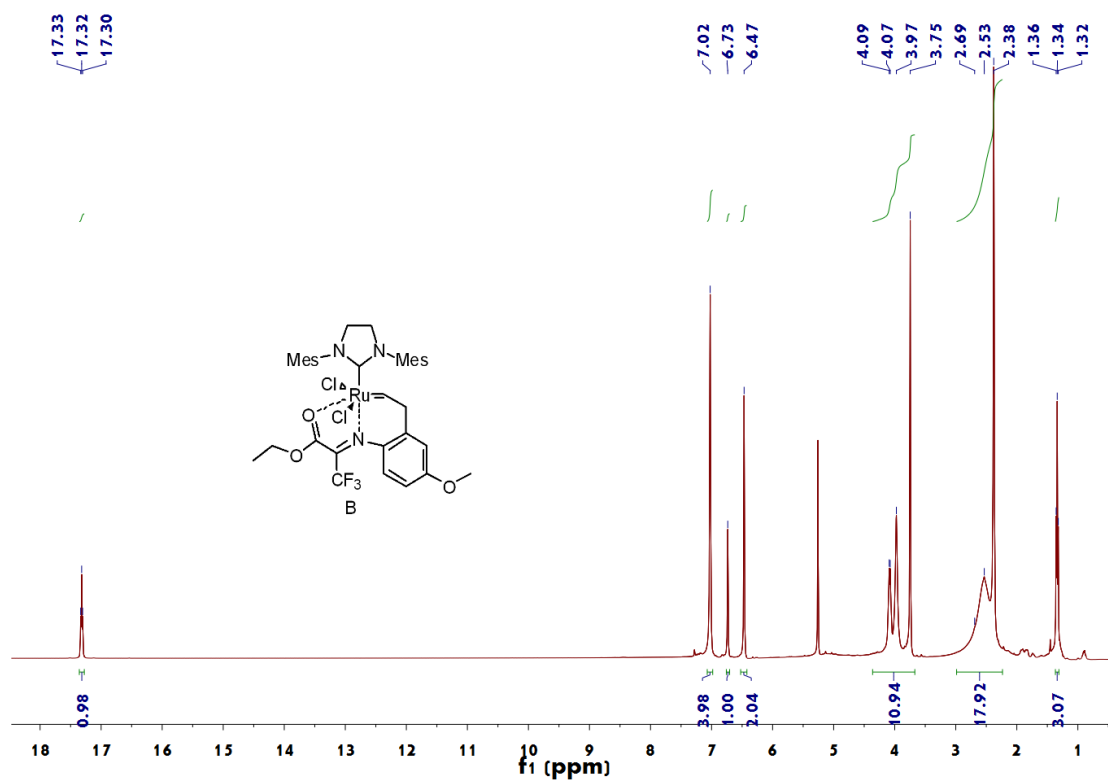

Figure S19:  $^{13}\text{C}$  NMR spectrum of compound **14c** in  $\text{CDCl}_3$

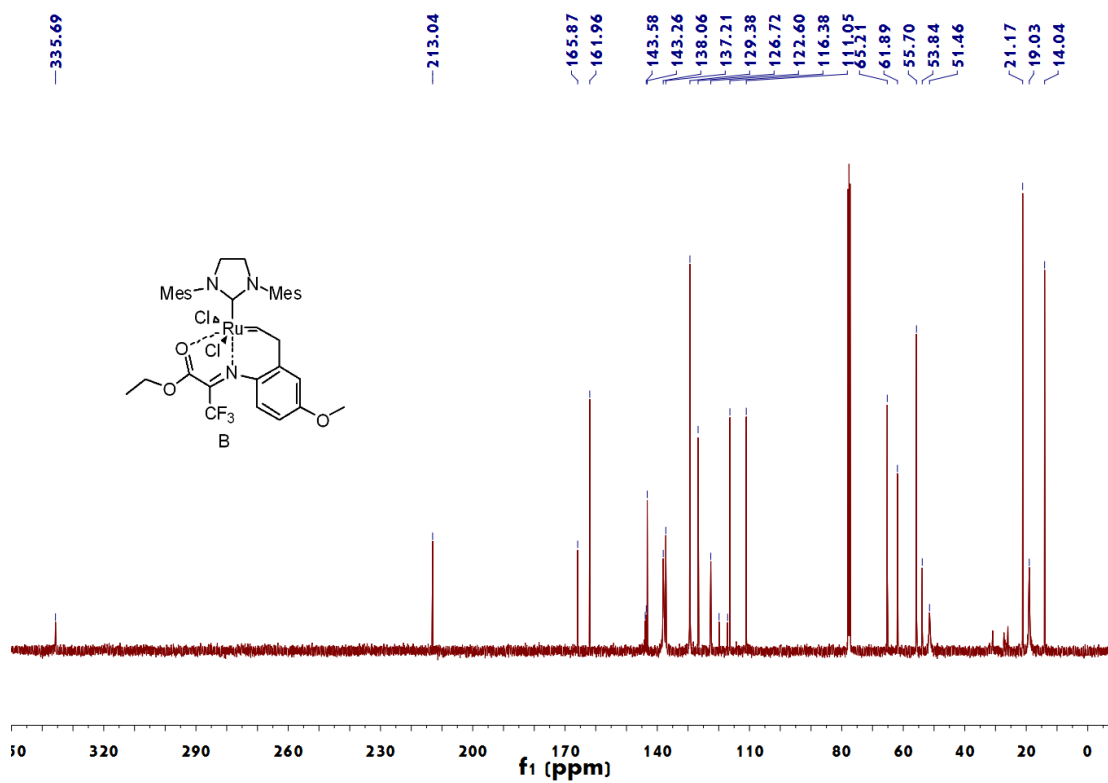

Figure S20:  $^{19}\text{F}$  NMR spectrum of compound **14c** in  $\text{CDCl}_3$

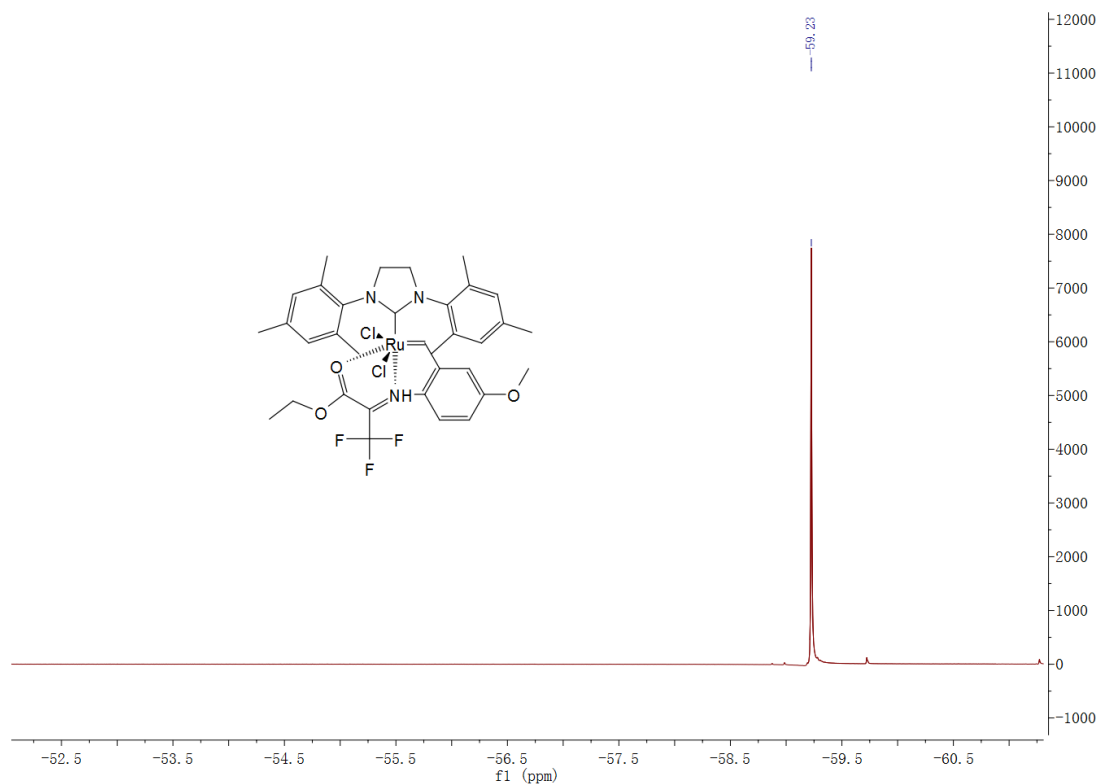

Figure S21:  $^1\text{H}$  NMR spectrum of compound **14d** in  $\text{CDCl}_3$

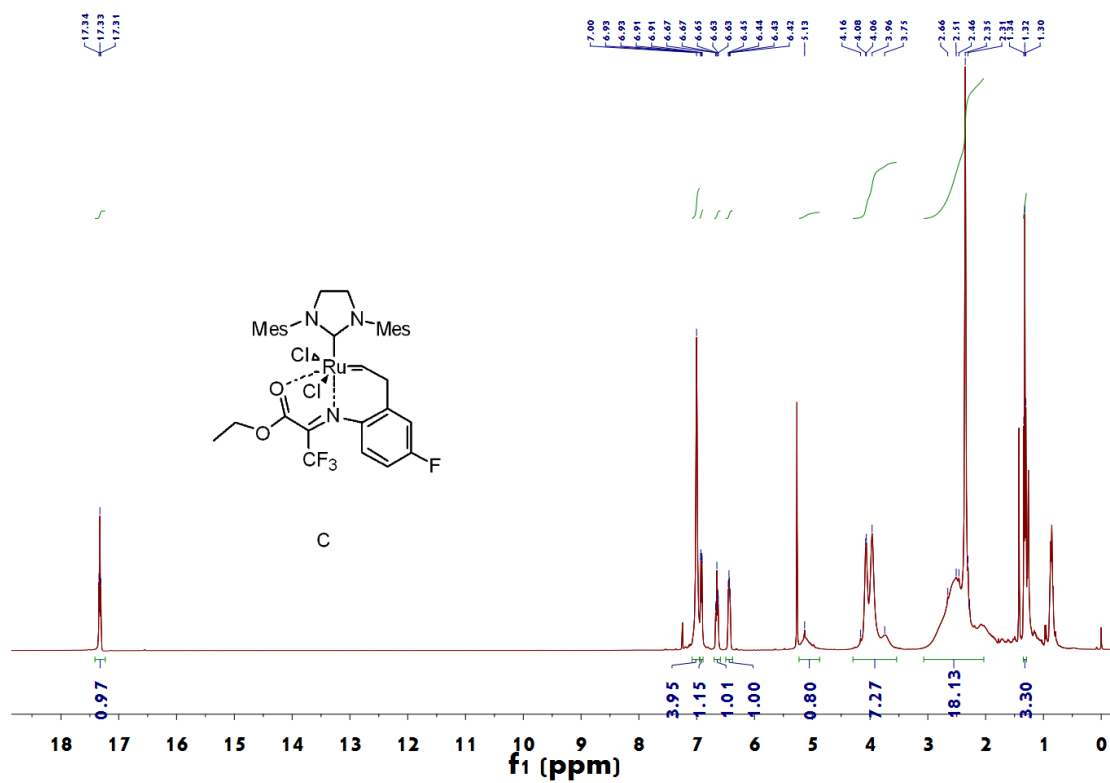

Figure S22:  $^{13}\text{C}$  NMR spectrum of compound **14d** in  $\text{CDCl}_3$

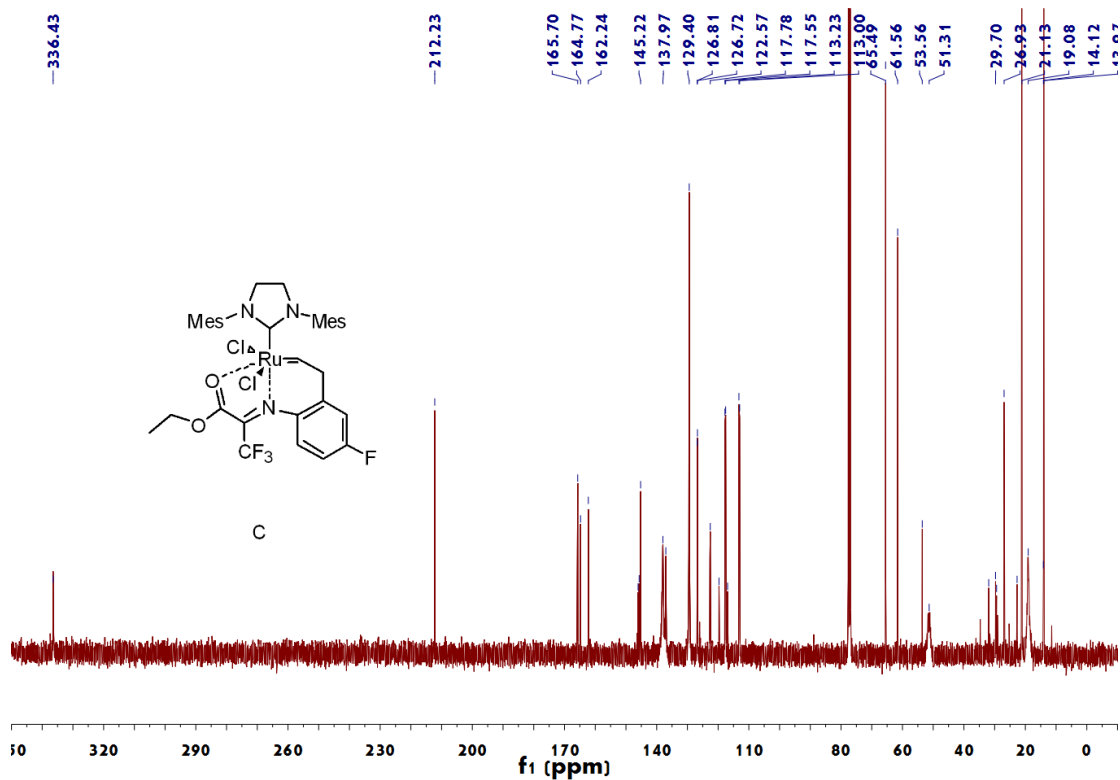

Figure S23:  $^{19}\text{F}$  NMR spectrum of compound **14d** in  $\text{CDCl}_3$

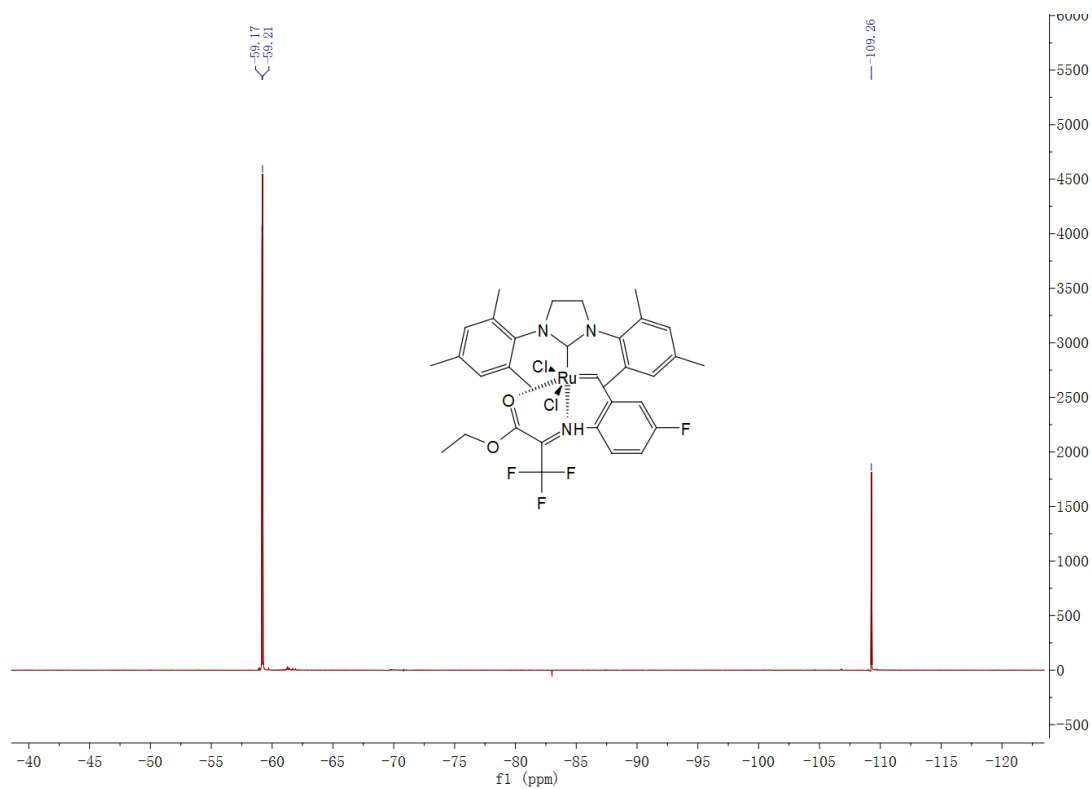

Figure S24:  $^1\text{H}$  NMR spectrum of compound **14e** in  $\text{CDCl}_3$

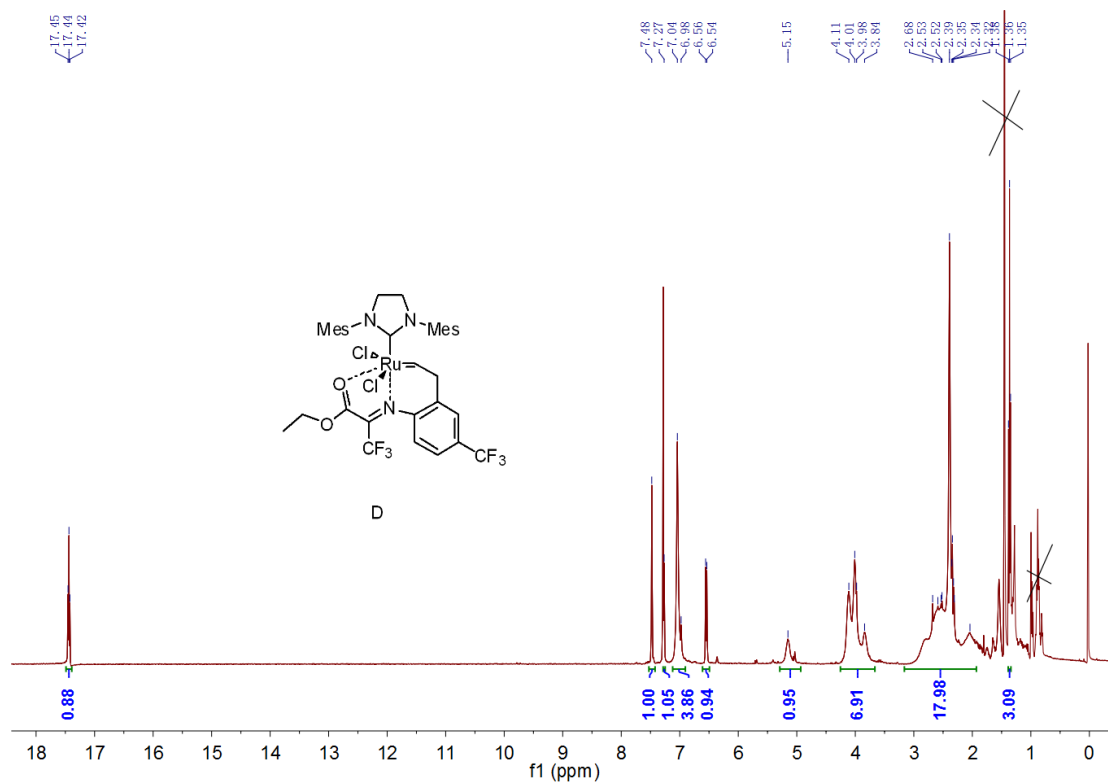

Figure S25:  $^{13}\text{C}$  NMR spectrum of compound **14e** in  $\text{CDCl}_3$

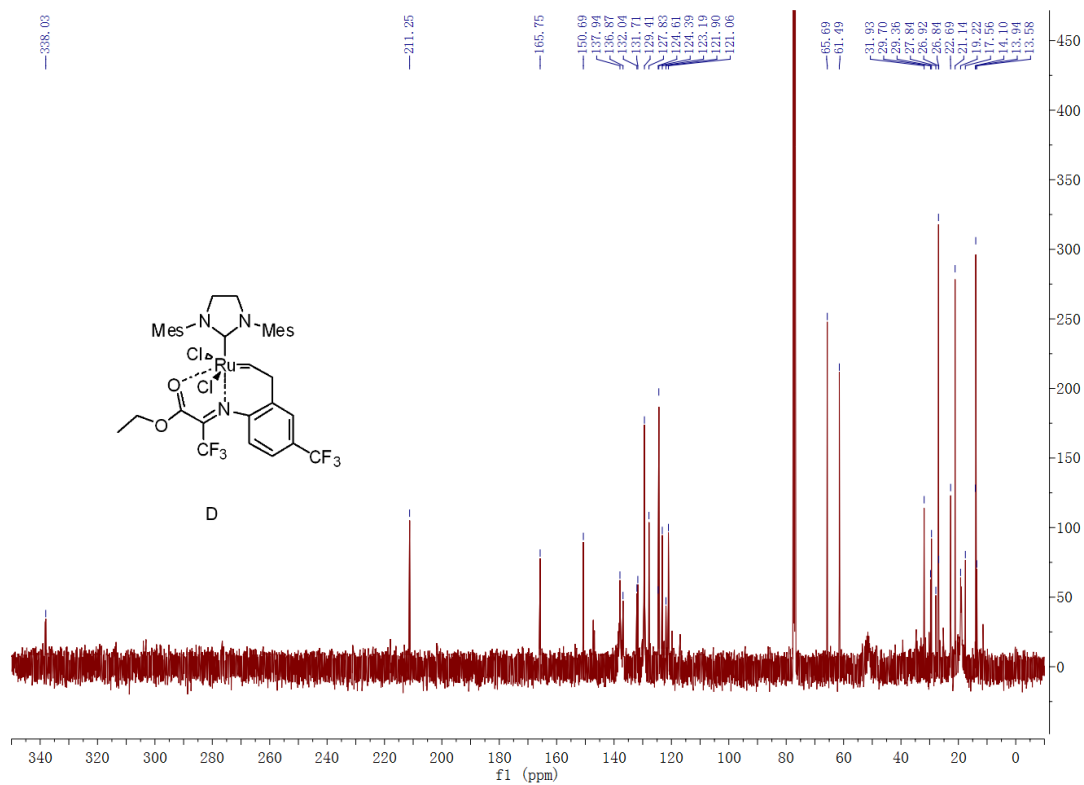



Figure S26:  $^{19}\text{F}$  NMR spectrum of compound **14e** in  $\text{CDCl}_3$

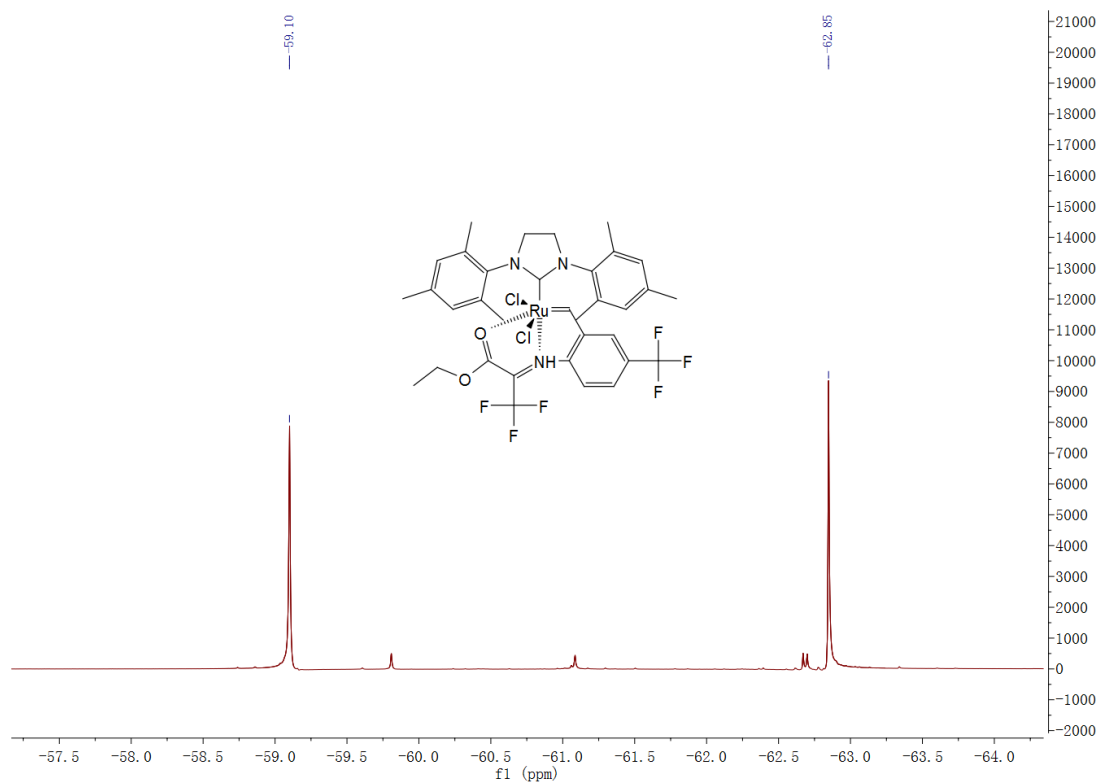

Figure S27:  $^1\text{H}$  NMR spectrum of compound **14f** in  $\text{CDCl}_3$

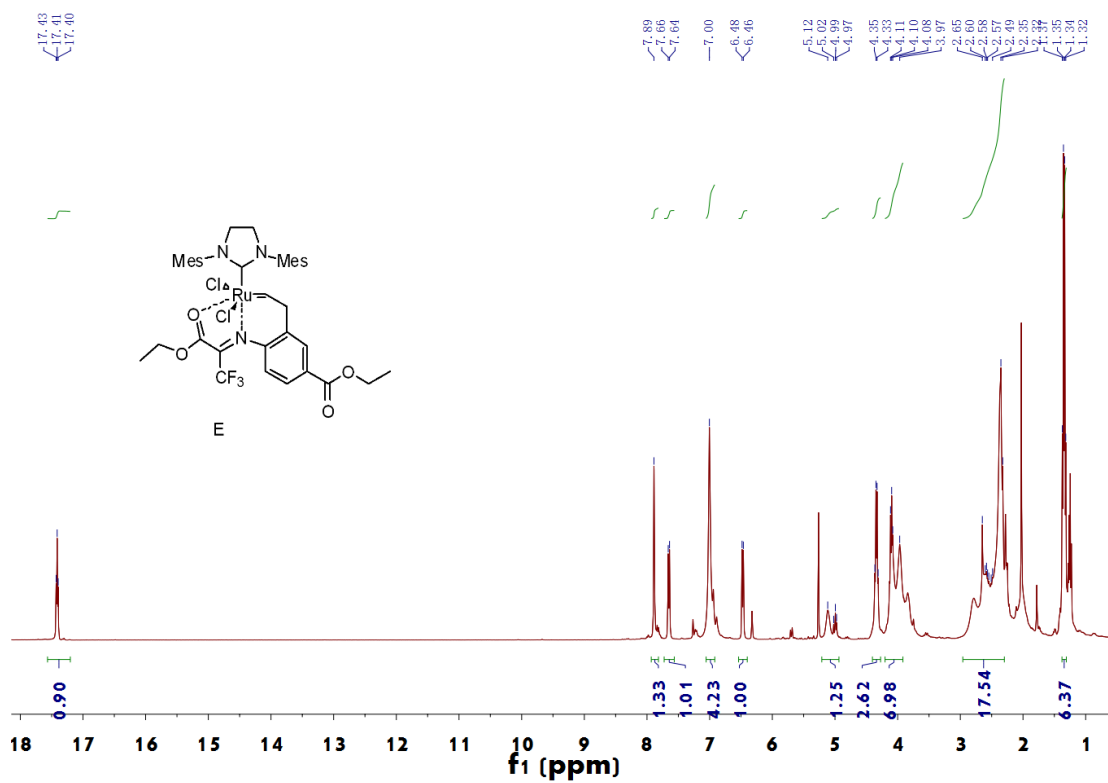

Figure S28:  $^{13}\text{C}$  NMR spectrum of compound **14f** in  $\text{CDCl}_3$

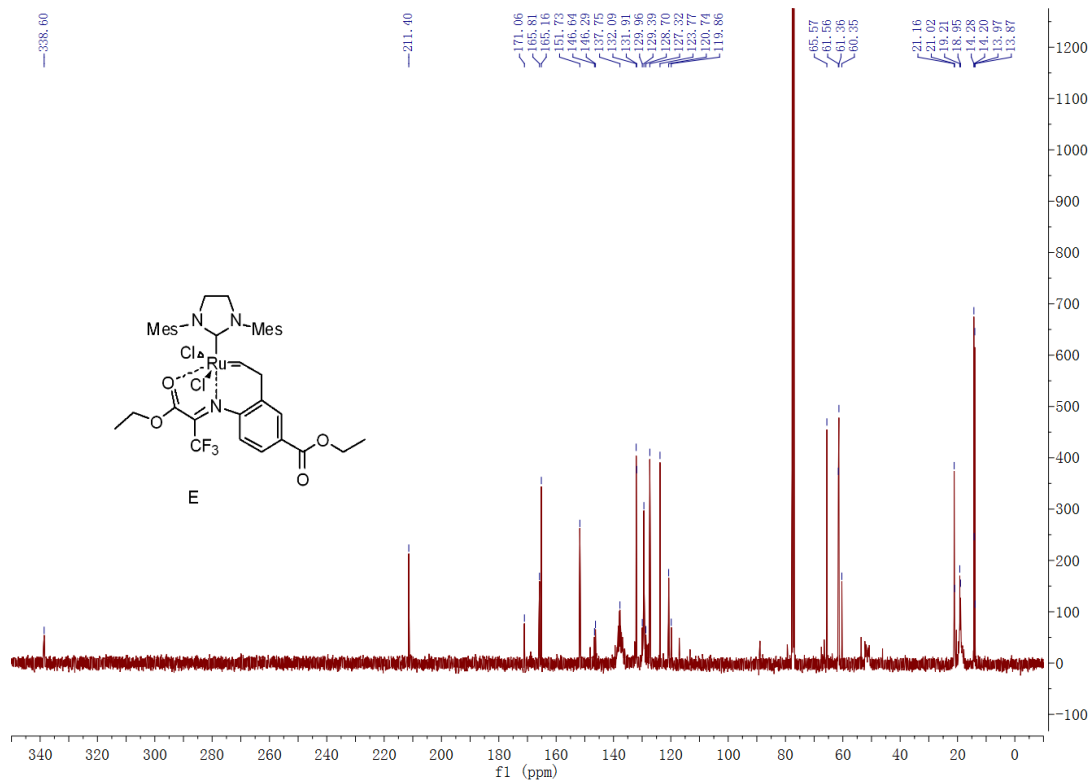

Figure S29:  $^{19}\text{F}$  NMR spectrum of compound **14f** in  $\text{CDCl}_3$

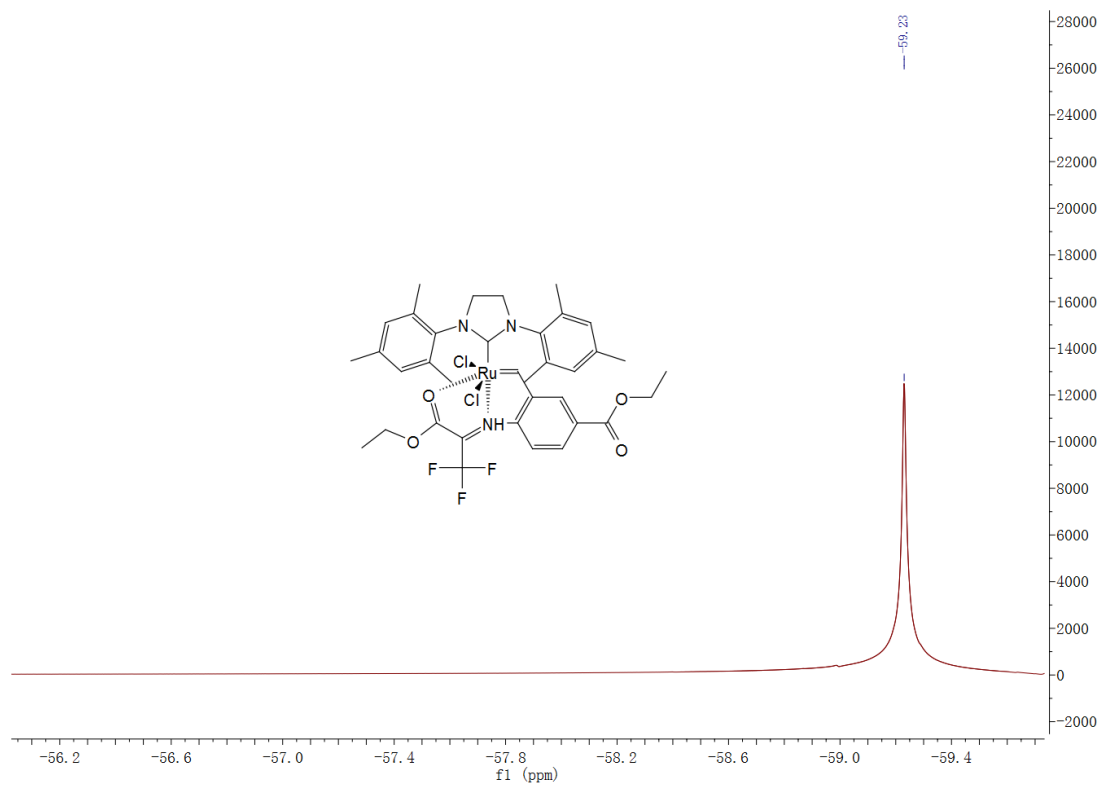

## Crystallographic details for **14d**

Table S1. Crystal data and structure refinement for **14d** (A160311C, CCDC: 1504010).

| Identification code                         | <b>A160311C</b>                                                                                              |
|---------------------------------------------|--------------------------------------------------------------------------------------------------------------|
| Empirical formula                           | C <sub>70</sub> H <sub>81</sub> Cl <sub>8</sub> F <sub>7</sub> N <sub>6</sub> O <sub>4</sub> Ru <sub>2</sub> |
| Formula weight                              | 1689.14                                                                                                      |
| Temperature/K                               | 100.1(4)                                                                                                     |
| Crystal system                              | monoclinic                                                                                                   |
| Space group                                 | P2 <sub>1</sub> /n                                                                                           |
| a/Å                                         | 16.0736(9)                                                                                                   |
| b/Å                                         | 15.5696(6)                                                                                                   |
| c/Å                                         | 16.6456(8)                                                                                                   |
| α/°                                         | 90                                                                                                           |
| β/°                                         | 116.710(7)                                                                                                   |
| γ/°                                         | 90                                                                                                           |
| Volume/Å <sup>3</sup>                       | 3721.2(4)                                                                                                    |
| Z                                           | 2                                                                                                            |
| ρ <sub>calc</sub> /g/cm <sup>3</sup>        | 1.508                                                                                                        |
| μ/mm <sup>-1</sup>                          | 6.504                                                                                                        |
| F(000)                                      | 1724.0                                                                                                       |
| Crystal size/mm <sup>3</sup>                | 0.2 × 0.1 × 0.08                                                                                             |
| Radiation                                   | CuKα (λ = 1.54184)                                                                                           |
| 2θ range for data collection/°              | 8.222 to 134.156                                                                                             |
| Index ranges                                | -18 ≤ h ≤ 19, -18 ≤ k ≤ 18, -19 ≤ l ≤ 12                                                                     |
| Reflections collected                       | 16049                                                                                                        |
| Independent reflections                     | 6616 [R <sub>int</sub> = 0.0755, R <sub>sigma</sub> = 0.0952]                                                |
| Data/restraints/parameters                  | 6616/0/449                                                                                                   |
| Goodness-of-fit on F <sup>2</sup>           | 0.994                                                                                                        |
| Final R indexes [I ≥ 2σ (I)]                | R <sub>1</sub> = 0.0500, wR <sub>2</sub> = 0.1181                                                            |
| Final R indexes [all data]                  | R <sub>1</sub> = 0.0688, wR <sub>2</sub> = 0.1276                                                            |
| Largest diff. peak/hole / e Å <sup>-3</sup> | 0.96/-1.03                                                                                                   |

Table S2. Fractional Atomic Coordinates ( $\times 10^4$ ) and Equivalent Isotropic Displacement Parameters ( $\text{\AA}^2 \times 10^3$ ) for **14d**.

| Atom | x         | y          | z          | U(eq)     |
|------|-----------|------------|------------|-----------|
| Ru1  | 5438.1(2) | 7127.6(2)  | 3300.0(2)  | 21.37(12) |
| Cl1  | 3835.8(7) | 6859.5(7)  | 2865.2(7)  | 28.6(2)   |
| Cl2  | 6991.3(7) | 7410.1(8)  | 3548.5(7)  | 29.7(2)   |
| F1   | 5013(3)   | 4028(2)    | 1958(2)    | 45.1(8)   |
| F2   | 3687(2)   | 4626(2)    | 1596.5(19) | 42.8(7)   |
| F0AA | 4526(2)   | 4243.3(19) | 2956.4(19) | 37.7(7)   |
| O1   | 5055(2)   | 6836(2)    | 1843(2)    | 29.0(7)   |
| O2   | 4418(3)   | 5741(2)    | 882(2)     | 34.1(8)   |
| N1   | 4982(3)   | 8838(3)    | 3915(3)    | 30.1(9)   |
| N2   | 4994(3)   | 8995(2)    | 2626(3)    | 28.4(8)   |
| N3   | 5507(3)   | 5806(2)    | 3229(2)    | 23.1(7)   |
| C1   | 5183(3)   | 8550(3)    | 4802(3)    | 25.9(9)   |
| C2   | 4459(4)   | 8288(3)    | 4988(3)    | 30.1(10)  |
| C3   | 4673(4)   | 8046(3)    | 5865(3)    | 30.8(10)  |
| C4   | 5580(4)   | 8075(3)    | 6547(3)    | 31.8(10)  |
| C5   | 6292(3)   | 8365(3)    | 6348(3)    | 28.8(9)   |
| C6   | 6099(3)   | 8621(3)    | 5487(3)    | 28.6(9)   |
| C7   | 3455(4)   | 8280(4)    | 4277(3)    | 41.5(12)  |
| C8   | 5804(5)   | 7807(4)    | 7496(3)    | 44.0(13)  |
| C9   | 6875(4)   | 8959(4)    | 5300(4)    | 39.2(12)  |
| C10  | 5153(3)   | 8423(3)    | 3289(3)    | 23.5(9)   |
| C11  | 4684(6)   | 9730(4)    | 3687(4)    | 50.8(17)  |
| C12  | 4694(5)   | 9848(3)    | 2784(3)    | 39.8(13)  |
| C13  | 5073(3)   | 8886(3)    | 1802(3)    | 23.7(9)   |
| C14  | 4302(3)   | 8627(3)    | 1031(3)    | 27.9(9)   |
| C15  | 4369(4)   | 8611(3)    | 219(3)     | 30(1)     |
| C16  | 5185(4)   | 8841(3)    | 181(3)     | 34.2(11)  |
| C17  | 5931(4)   | 9118(3)    | 962(3)     | 33.3(11)  |
| C18  | 5894(3)   | 9159(3)    | 1784(3)    | 29.5(10)  |
| C19  | 3397(4)   | 8390(4)    | 1034(3)    | 36.3(11)  |
| C20  | 6699(4)   | 9516(4)    | 2598(3)    | 43.0(12)  |
| C21  | 5260(4)   | 8801(4)    | -689(3)    | 41.8(13)  |
| C22  | 5866(3)   | 7015(3)    | 4516(3)    | 27.2(9)   |

|     |            |            |            |          |
|-----|------------|------------|------------|----------|
| C23 | 5522(3)    | 6324(3)    | 4908(3)    | 30.3(10) |
| C24 | 5998(3)    | 5516(3)    | 4833(3)    | 28.5(9)  |
| C25 | 5978(3)    | 5272(3)    | 4013(3)    | 26.1(9)  |
| C26 | 6483(4)    | 4560(3)    | 3968(3)    | 32.4(10) |
| C27 | 6983(4)    | 4075(3)    | 4726(4)    | 37.6(11) |
| C28 | 6978(4)    | 4292(4)    | 5525(4)    | 38.5(12) |
| C29 | 6491(4)    | 5000(3)    | 5583(3)    | 32.7(10) |
| C30 | 5008(4)    | 5466(3)    | 2436(3)    | 28.9(10) |
| C31 | 4569(4)    | 4595(3)    | 2241(3)    | 34.0(11) |
| C32 | 4808(3)    | 6080(3)    | 1687(3)    | 27.7(9)  |
| C33 | 4190(4)    | 6338(4)    | 128(3)     | 39.9(12) |
| C34 | 3965(5)    | 5814(4)    | -681(4)    | 53.0(16) |
| F3  | 7551(5)    | 3888(5)    | 6257(4)    | 50.1(16) |
| Cl3 | 8163.4(11) | 7565.8(12) | 2115.7(10) | 57.3(4)  |
| Cl4 | 6803.5(15) | 6633.4(14) | 559.0(12)  | 71.3(5)  |
| C35 | 7080(4)    | 7030(4)    | 1641(4)    | 44.0(13) |

---

Table S3. Anisotropic Displacement Parameters ( $\text{\AA}^2 \times 10^3$ ) for **14d**.

| Atom | U <sub>11</sub> | U <sub>22</sub> | U <sub>33</sub> | U <sub>23</sub> | U <sub>13</sub> | U <sub>12</sub> |
|------|-----------------|-----------------|-----------------|-----------------|-----------------|-----------------|
| Ru1  | 27.64(17)       | 17.19(18)       | 23.82(17)       | 0.56(12)        | 15.60(12)       | 1.71(13)        |
| Cl1  | 28.0(5)         | 26.5(6)         | 33.7(5)         | -0.4(4)         | 16.1(4)         | -1.1(4)         |
| Cl2  | 29.5(5)         | 35.1(6)         | 31.2(5)         | 1.9(4)          | 19.7(4)         | 1.0(5)          |
| F1   | 74(2)           | 25.0(16)        | 49.7(17)        | -4.7(13)        | 39.8(17)        | 1.7(16)         |
| F2   | 48.9(18)        | 33.3(17)        | 38.3(14)        | -2.0(12)        | 12.6(14)        | -8.0(15)        |
| F0AA | 57.0(19)        | 26.3(15)        | 37.6(14)        | -1.5(11)        | 28.2(14)        | -7.7(14)        |
| O1   | 40.8(18)        | 19.0(17)        | 33.2(15)        | 3.9(12)         | 22.0(14)        | 2.8(14)         |
| O2   | 53(2)           | 24.4(18)        | 26.3(15)        | -0.8(13)        | 19.4(15)        | 4.4(16)         |
| N1   | 50(2)           | 20(2)           | 27.8(18)        | 3.0(15)         | 24.1(18)        | 8.4(18)         |
| N2   | 49(2)           | 13.9(18)        | 29.0(18)        | 3.9(14)         | 23.5(17)        | 8.0(17)         |
| N3   | 28.2(18)        | 15.6(18)        | 28.1(17)        | -2.2(14)        | 15.0(15)        | 0.6(15)         |
| C1   | 37(2)           | 21(2)           | 22.5(19)        | 2.7(16)         | 15.5(18)        | 5.4(19)         |
| C2   | 39(3)           | 29(3)           | 28(2)           | -6.6(18)        | 20(2)           | 2(2)            |
| C3   | 45(3)           | 21(2)           | 38(2)           | -5.4(18)        | 29(2)           | -5(2)           |
| C4   | 58(3)           | 18(2)           | 28(2)           | -1.8(17)        | 27(2)           | 2(2)            |
| C5   | 32(2)           | 24(2)           | 27(2)           | -3.6(17)        | 10.7(18)        | 4(2)            |
| C6   | 36(2)           | 22(2)           | 32(2)           | -4.8(17)        | 19(2)           | 0(2)            |
| C7   | 45(3)           | 46(3)           | 35(2)           | -7(2)           | 20(2)           | 4(3)            |
| C8   | 73(4)           | 29(3)           | 31(2)           | 0(2)            | 25(2)           | 6(3)            |
| C9   | 44(3)           | 35(3)           | 45(3)           | -13(2)          | 27(2)           | -14(2)          |
| C10  | 33(2)           | 16(2)           | 24.4(19)        | -3.5(16)        | 15.2(17)        | -1.7(18)        |
| C11  | 102(5)          | 25(3)           | 41(3)           | 8(2)            | 45(3)           | 21(3)           |
| C12  | 70(4)           | 25(3)           | 31(2)           | 6.1(19)         | 29(2)           | 16(3)           |
| C13  | 34(2)           | 18(2)           | 21.9(19)        | 0.7(15)         | 15.0(17)        | 1.5(18)         |
| C14  | 35(2)           | 22(2)           | 27(2)           | 3.1(17)         | 13.9(19)        | 3(2)            |
| C15  | 40(3)           | 24(2)           | 25(2)           | 1.7(17)         | 14.1(19)        | 1(2)            |
| C16  | 52(3)           | 29(3)           | 26(2)           | 0.9(18)         | 20(2)           | 1(2)            |
| C17  | 39(3)           | 34(3)           | 34(2)           | 5(2)            | 22(2)           | -1(2)           |
| C18  | 37(3)           | 25(2)           | 28(2)           | 3.0(17)         | 15.5(19)        | -2(2)           |
| C19  | 35(3)           | 39(3)           | 33(2)           | 4(2)            | 13(2)           | 1(2)            |
| C20  | 46(3)           | 39(3)           | 39(3)           | -1(2)           | 15(2)           | -11(3)          |
| C21  | 62(4)           | 41(3)           | 33(2)           | 6(2)            | 31(3)           | 9(3)            |
| C22  | 35(2)           | 20(2)           | 37(2)           | -5.3(18)        | 25.7(19)        | -1.1(19)        |
| C23  | 36(2)           | 35(3)           | 25(2)           | 5.4(18)         | 17.2(18)        | 4(2)            |

|     |          |          |         |          |          |           |
|-----|----------|----------|---------|----------|----------|-----------|
| C24 | 31(2)    | 26(2)    | 31(2)   | -1.7(18) | 16.4(19) | -4(2)     |
| C25 | 35(2)    | 15(2)    | 35(2)   | 6.3(17)  | 21.5(19) | 3.9(19)   |
| C26 | 45(3)    | 21(2)    | 41(2)   | 0.1(19)  | 28(2)    | 1(2)      |
| C27 | 41(3)    | 25(3)    | 51(3)   | 5(2)     | 25(2)    | 5(2)      |
| C28 | 40(3)    | 33(3)    | 41(3)   | 16(2)    | 17(2)    | 10(2)     |
| C29 | 39(3)    | 31(3)    | 35(2)   | 4.5(19)  | 22(2)    | -1(2)     |
| C30 | 39(2)    | 26(2)    | 27(2)   | 0.4(18)  | 19.8(19) | 7(2)      |
| C31 | 53(3)    | 19(2)    | 37(2)   | -3.3(19) | 26(2)    | -2(2)     |
| C32 | 40(2)    | 23(2)    | 28(2)   | -0.9(18) | 22(2)    | 6(2)      |
| C33 | 59(3)    | 35(3)    | 30(2)   | 4(2)     | 24(2)    | 8(3)      |
| C34 | 76(4)    | 48(4)    | 31(2)   | 2(2)     | 21(3)    | 14(3)     |
| F3  | 54(4)    | 45(4)    | 48(3)   | 24(3)    | 19(3)    | 14(3)     |
| Cl3 | 57.0(8)  | 74.1(11) | 56.5(8) | -8.0(7)  | 39.4(7)  | -15.4(8)  |
| Cl4 | 91.1(13) | 78.5(13) | 56.1(9) | -22.6(8) | 43.6(9)  | -16.3(11) |
| C35 | 58(3)    | 38(3)    | 46(3)   | 0(2)     | 34(3)    | -6(3)     |

---

Table S4 . Bond Lengths for **14d**.

| <b>Atom</b> | <b>Atom</b> | <b>Length/Å</b> | <b>Atom</b> | <b>Atom</b> | <b>Length/Å</b> |
|-------------|-------------|-----------------|-------------|-------------|-----------------|
| Ru1         | C11         | 2.3782(11)      | C5          | C6          | 1.383(7)        |
| Ru1         | C12         | 2.3809(11)      | C6          | C9          | 1.510(7)        |
| Ru1         | O1          | 2.264(3)        | C11         | C12         | 1.523(6)        |
| Ru1         | N3          | 2.068(4)        | C13         | C14         | 1.383(7)        |
| Ru1         | C10         | 2.067(4)        | C13         | C18         | 1.399(7)        |
| Ru1         | C22         | 1.830(4)        | C14         | C15         | 1.403(6)        |
| F1          | C31         | 1.348(6)        | C14         | C19         | 1.505(7)        |
| F2          | C31         | 1.340(7)        | C15         | C16         | 1.388(7)        |
| F0AA        | C31         | 1.340(5)        | C16         | C17         | 1.382(8)        |
| O1          | C32         | 1.231(6)        | C16         | C21         | 1.507(6)        |
| O2          | C32         | 1.308(6)        | C17         | C18         | 1.398(6)        |
| O2          | C33         | 1.471(6)        | C18         | C20         | 1.499(7)        |
| N1          | C1          | 1.434(5)        | C22         | C23         | 1.488(6)        |
| N1          | C10         | 1.355(5)        | C23         | C24         | 1.507(7)        |
| N1          | C11         | 1.462(6)        | C24         | C25         | 1.405(6)        |
| N2          | C10         | 1.349(6)        | C24         | C29         | 1.393(7)        |
| N2          | C12         | 1.477(6)        | C25         | C26         | 1.394(7)        |
| N2          | C13         | 1.444(5)        | C26         | C27         | 1.377(8)        |
| N3          | C25         | 1.442(6)        | C27         | C28         | 1.376(8)        |
| N3          | C30         | 1.309(6)        | C28         | C29         | 1.379(8)        |
| C1          | C2          | 1.393(7)        | C28         | F3          | 1.311(8)        |
| C1          | C6          | 1.403(7)        | C30         | C31         | 1.495(7)        |
| C2          | C3          | 1.392(7)        | C30         | C32         | 1.489(6)        |
| C2          | C7          | 1.513(7)        | C33         | C34         | 1.473(7)        |
| C3          | C4          | 1.389(8)        | C13         | C35         | 1.765(6)        |
| C4          | C5          | 1.402(7)        | C14         | C35         | 1.762(5)        |
| C4          | C8          | 1.513(6)        |             |             |                 |



Table S5. Bond Angles for **14d**

| Atom | Atom | Atom | Angle/°    | Atom | Atom | Atom | Angle/°  |
|------|------|------|------------|------|------|------|----------|
| C11  | Ru1  | C12  | 173.15(4)  | N2   | C12  | C11  | 102.4(4) |
| O1   | Ru1  | C11  | 84.41(9)   | C14  | C13  | N2   | 119.4(4) |
| O1   | Ru1  | C12  | 89.00(9)   | C14  | C13  | C18  | 121.9(4) |
| N3   | Ru1  | C11  | 83.45(11)  | C18  | C13  | N2   | 118.1(4) |
| N3   | Ru1  | C12  | 96.62(11)  | C13  | C14  | C15  | 118.3(4) |
| N3   | Ru1  | O1   | 74.63(13)  | C13  | C14  | C19  | 122.2(4) |
| C10  | Ru1  | C11  | 87.89(13)  | C15  | C14  | C19  | 119.5(4) |
| C10  | Ru1  | C12  | 91.85(13)  | C16  | C15  | C14  | 121.5(5) |
| C10  | Ru1  | O1   | 103.52(14) | C15  | C16  | C21  | 121.2(5) |
| C10  | Ru1  | N3   | 171.28(16) | C17  | C16  | C15  | 118.4(4) |
| C22  | Ru1  | C11  | 97.88(14)  | C17  | C16  | C21  | 120.4(5) |
| C22  | Ru1  | C12  | 88.97(14)  | C16  | C17  | C18  | 122.2(5) |
| C22  | Ru1  | O1   | 162.10(17) | C13  | C18  | C20  | 122.2(4) |
| C22  | Ru1  | N3   | 87.95(17)  | C17  | C18  | C13  | 117.6(4) |
| C22  | Ru1  | C10  | 94.32(18)  | C17  | C18  | C20  | 120.2(4) |
| C32  | O1   | Ru1  | 108.9(3)   | C23  | C22  | Ru1  | 121.7(3) |
| C32  | O2   | C33  | 116.1(4)   | C22  | C23  | C24  | 105.3(4) |
| C1   | N1   | C11  | 117.4(4)   | C25  | C24  | C23  | 121.1(4) |
| C10  | N1   | C1   | 127.8(4)   | C29  | C24  | C23  | 120.9(4) |
| C10  | N1   | C11  | 114.1(4)   | C29  | C24  | C25  | 118.0(4) |
| C10  | N2   | C12  | 113.9(3)   | C24  | C25  | N3   | 119.8(4) |
| C10  | N2   | C13  | 129.4(4)   | C26  | C25  | N3   | 119.5(4) |
| C13  | N2   | C12  | 116.7(3)   | C26  | C25  | C24  | 120.5(4) |
| C25  | N3   | Ru1  | 122.8(3)   | C27  | C26  | C25  | 120.1(4) |
| C30  | N3   | Ru1  | 115.9(3)   | C28  | C27  | C26  | 119.7(5) |
| C30  | N3   | C25  | 120.9(4)   | C27  | C28  | C29  | 120.9(5) |
| C2   | C1   | N1   | 119.8(4)   | F3   | C28  | C27  | 118.2(6) |
| C2   | C1   | C6   | 121.2(4)   | F3   | C28  | C29  | 120.2(6) |
| C6   | C1   | N1   | 118.7(4)   | C28  | C29  | C24  | 120.7(4) |
| C1   | C2   | C7   | 122.2(4)   | N3   | C30  | C31  | 127.0(4) |
| C3   | C2   | C1   | 118.4(5)   | N3   | C30  | C32  | 112.9(4) |
| C3   | C2   | C7   | 119.5(4)   | C32  | C30  | C31  | 119.9(4) |
| C4   | C3   | C2   | 121.5(4)   | F1   | C31  | C30  | 113.4(4) |
| C3   | C4   | C5   | 119.1(4)   | F2   | C31  | F1   | 106.2(4) |
| C3   | C4   | C8   | 121.0(5)   | F2   | C31  | C30  | 111.6(4) |

|    |     |     |          |      |     |     |          |
|----|-----|-----|----------|------|-----|-----|----------|
| C5 | C4  | C8  | 119.9(5) | F0AA | C31 | F1  | 106.9(4) |
| C6 | C5  | C4  | 120.7(5) | F0AA | C31 | F2  | 105.6(4) |
| C1 | C6  | C9  | 121.5(4) | F0AA | C31 | C30 | 112.7(4) |
| C5 | C6  | C1  | 119.0(4) | O1   | C32 | O2  | 124.3(4) |
| C5 | C6  | C9  | 119.5(5) | O1   | C32 | C30 | 120.7(4) |
| N1 | C10 | Ru1 | 125.4(3) | O2   | C32 | C30 | 114.9(4) |
| N2 | C10 | Ru1 | 127.6(3) | O2   | C33 | C34 | 107.1(4) |
| N2 | C10 | N1  | 106.6(4) | Cl4  | C35 | Cl3 | 111.6(3) |
| N1 | C11 | C12 | 102.9(4) |      |     |     |          |

---

Table S6. Hydrogen Atom Coordinates ( $\text{\AA} \times 10^4$ ) and Isotropic Displacement Parameters ( $\text{\AA}^2 \times 10^3$ ) for **14d**

| Atom | <i>x</i> | <i>y</i> | <i>z</i> | U(eq) |
|------|----------|----------|----------|-------|
| H3   | 4198     | 7860     | 5996     | 37    |
| H5   | 6902     | 8386     | 6801     | 35    |
| H7A  | 3182     | 8833     | 4251     | 62    |
| H7B  | 3116     | 7852     | 4425     | 62    |
| H7C  | 3430     | 8148     | 3703     | 62    |
| H8A  | 5938     | 8307     | 7871     | 66    |
| H8B  | 6336     | 7433     | 7725     | 66    |
| H8C  | 5280     | 7510     | 7495     | 66    |
| H9A  | 6912     | 8623     | 4834     | 59    |
| H9B  | 7455     | 8922     | 5837     | 59    |
| H9C  | 6753     | 9548     | 5112     | 59    |
| H11A | 5113     | 10122    | 4134     | 61    |
| H11B | 4064     | 9818     | 3635     | 61    |
| H12A | 4080     | 9994     | 2316     | 48    |
| H12B | 5132     | 10291    | 2815     | 48    |
| H15  | 3856     | 8442     | -305     | 36    |
| H17  | 6476     | 9283     | 939      | 40    |
| H19A | 3488     | 7894     | 1407     | 54    |
| H19B | 2940     | 8263     | 432      | 54    |
| H19C | 3184     | 8861     | 1266     | 54    |
| H20A | 6511     | 10037    | 2781     | 64    |
| H20B | 7204     | 9637     | 2458     | 64    |
| H20C | 6897     | 9105     | 3078     | 64    |
| H21A | 5630     | 8314     | -679     | 63    |
| H21B | 5548     | 9317     | -759     | 63    |
| H21C | 4649     | 8747     | -1182    | 63    |
| H22A | 6537     | 6951     | 4774     | 33    |
| H22B | 5749     | 7557     | 4734     | 33    |
| H23A | 4850     | 6268     | 4576     | 36    |
| H23B | 5683     | 6448     | 5532     | 36    |
| H26  | 6481     | 4413     | 3426     | 39    |
| H27  | 7323     | 3602     | 4698     | 45    |
| H28  | 7307     | 3957     | 6034     | 46    |
| H29  | 6493     | 5135     | 6128     | 39    |

|      |      |      |       |    |
|------|------|------|-------|----|
| H33A | 4717 | 6710 | 244   | 48 |
| H33B | 3662 | 6693 | 45    | 48 |
| H34A | 3786 | 6183 | -1194 | 80 |
| H34B | 3461 | 5432 | -774  | 80 |
| H34C | 4502 | 5485 | -601  | 80 |
| H35A | 7100 | 6557 | 2029  | 53 |
| H35B | 6597 | 7424 | 1605  | 53 |

---
